# Supplementary material for: Ortho-Phosphinoarenesulfonamide-Mediated Staudinger Reduction of Aryl and Alkyl Azides
Source: MDPI journal article supplement (doi:10.3390/molecules27175707), 2022-09-05
Supplement: s1 [file s1]

## SUPPORTING INFORMATION

# ***ortho*-Phosphinoarenesulfonamide-mediated Staudinger reduction of aryl and alkyl azides**

Xingzhao Li <sup>1</sup>, Zhenguo Wang <sup>1</sup>, Wenjun Luo <sup>1</sup>, Zixu Wang <sup>1</sup>, Keshu Yin <sup>1</sup>, and Le Li <sup>1,2\*</sup>

<sup>1</sup> PCFM Lab and GDHPRC Lab, School of Chemistry, Sun Yat-sen University, Guangzhou 510275, China

<sup>2</sup> Center for Nephrology and Clinical Metabolomics and Division of Nephrology and Rheumatology, Shanghai Tenth People's Hospital, School of Medicine, Tongji University, Shanghai 200072, China

\* Correspondence: lile26@mail.sysu.edu.cn

## Table of Contents

|                                                                                                       |     |
|-------------------------------------------------------------------------------------------------------|-----|
| 1 DFT Studies and Corresponding Cartesian Coordinates .....                                           | S2  |
| 2 NMR Spectra of New Compounds .....                                                                  | S34 |
| 3 Reference List for the Characterization Data of the Azides <b>1</b> and the Products <b>3</b> ..... | S43 |

## 1 DFT Studies and Corresponding Cartesian Coordinates

**Computational details:** The calculations were carried out with the Gaussian 09 software package[34]. The structures were optimized by the density functional theory (DFT)[35] with the B3LYP functional[36–37] with basis set 6-31G(d)[38–39] in the gas phase. Frequency analysis was conducted at the same level of theory to verify the stationary points to be real minima or saddle points and to obtain the thermodynamic energy corrections at 298.15 K. Intrinsic reaction coordinate (IRC)[40–42] calculations were performed to confirm the connection between two correct minima for a transition state. More accurate electronic energy results were refined by calculating the single-point energy at the B3LYP-D3(BJ)[10]/6-311++G(2df, 2p)[38–39] level of theory with the SMD model[44] (solvent = THF).

**Table S1.** Calculated energy data and imaginary frequencies for all structures.

| Structure                                  | Energy (au)                                    | Thermal<br>correction to<br>Enthalpy (au) | Thermal<br>correction to<br>Gibbs Free<br>Energy (au) | Imaginary<br>frequency<br>(cm <sup>-1</sup> ) |
|--------------------------------------------|------------------------------------------------|-------------------------------------------|-------------------------------------------------------|-----------------------------------------------|
|                                            | RB3LYP-D3(bj)<br>6-311++G(2df,2p)<br>SMD (THF) | B3LYP<br>6-31G(d)<br>GAS                  | B3LYP<br>6-31G(d)<br>GAS                              | B3LYP<br>6-31G(d)<br>GAS                      |
| <b>SM</b>                                  | -1909.23186094                                 | 0.422983                                  | 0.333759                                              | None                                          |
| <b>PPh<sub>3</sub></b>                     | -1036.65233648                                 | 0.291106                                  | 0.227373                                              | None                                          |
| <b>H<sub>2</sub>O</b>                      | -76.46961273                                   | 0.024939                                  | 0.002838                                              | None                                          |
| <b>4-CO<sub>2</sub>Me-PhN<sub>3</sub></b>  | -623.97572241                                  | 0.159414                                  | 0.108260                                              | None                                          |
| <b>TS-1</b>                                | -2533.20730189                                 | 0.582809                                  | 0.463490                                              | None                                          |
| <b>TS-1'</b>                               | -1660.62244703                                 | 0.451061                                  | 0.355397                                              | 1                                             |
| <b>Int-1</b>                               | -2533.23343372                                 | 0.584702                                  | 0.465963                                              | None                                          |
| <b>Int-1'</b>                              | -1660.65160277                                 | 0.452861                                  | 0.360644                                              | None                                          |
| <b>TS-2</b>                                | -2533.19295898                                 | 0.582229                                  | 0.464798                                              | None                                          |
| <b>TS-2'</b>                               | -1660.61786043                                 | 0.450685                                  | 0.359975                                              | 1                                             |
| <b>Int-2</b>                               | -2423.75255325                                 | 0.573544                                  | 0.460855                                              | None                                          |
| <b>Int-2'</b>                              | -1551.16866891                                 | 0.441744                                  | 0.353330                                              | 0                                             |
| <b>TS-3</b>                                | -2423.74126002                                 | 0.568899                                  | 0.457782                                              | 1                                             |
| <b>TS-3'</b>                               | -1627.60300964                                 | 0.465044                                  | 0.374102                                              | None                                          |
| <b>Int-3</b>                               | -2423.74352190                                 | 0.572330                                  | 0.460629                                              | None                                          |
| <b>Int-3'</b>                              | -1627.62266367                                 | 0.470228                                  | 0.380589                                              | None                                          |
| <b>Int-4</b>                               | -2423.73620712                                 | 0.573688                                  | 0.461709                                              | None                                          |
| <b>Int-4'</b>                              | -1627.62640480                                 | 0.470250                                  | 0.379852                                              | 0                                             |
| <b>TS-4</b>                                | -2423.71898879                                 | 0.569503                                  | 0.457229                                              | None                                          |
| <b>TS-4'</b>                               | -1627.62190583                                 | 0.468755                                  | 0.379071                                              | None                                          |
| <b>Product</b>                             | -1908.03804540                                 | 0.399955                                  | 0.313968                                              | 0                                             |
| <b>Ph<sub>3</sub>PO</b>                    | -1111.95367790                                 | 0.296993                                  | 0.232914                                              | None                                          |
| <b>N<sub>2</sub></b>                       | -109.56124218                                  | 0.008904                                  | -0.012851                                             | None                                          |
| <b>4-CO<sub>2</sub>Me-PhNH<sub>2</sub></b> | -515.72017775                                  | 0.171881                                  | 0.124814                                              | None                                          |

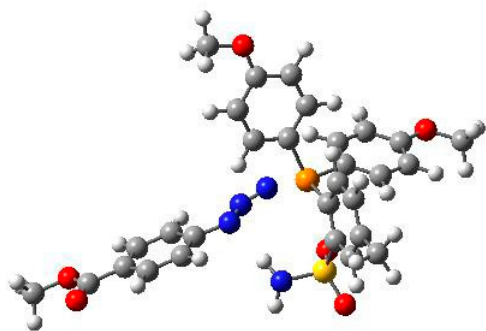

TS-1

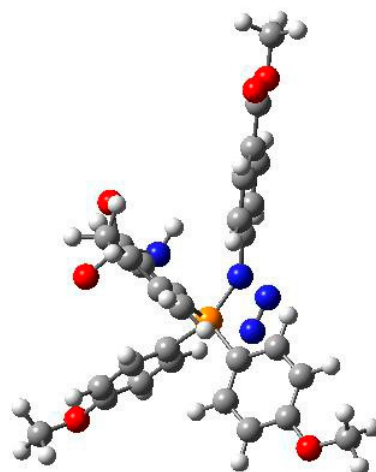

TS-2

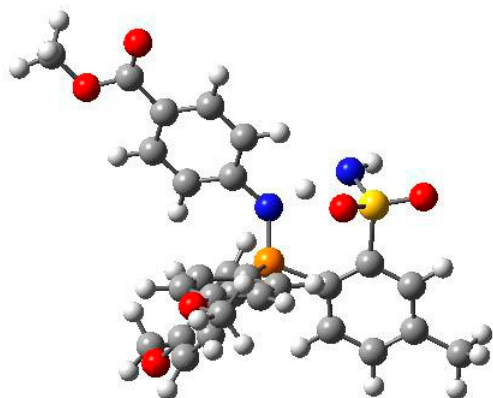

TS-3

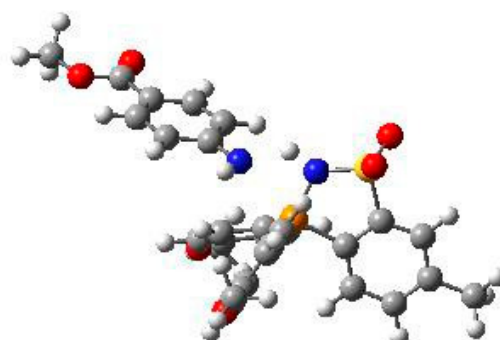

TS-4

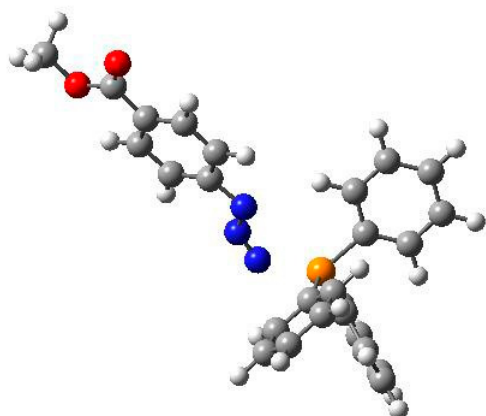

TS-1'

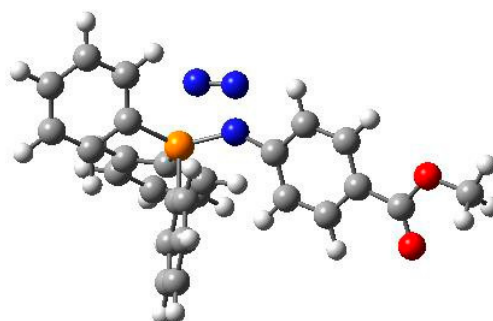

TS-2'

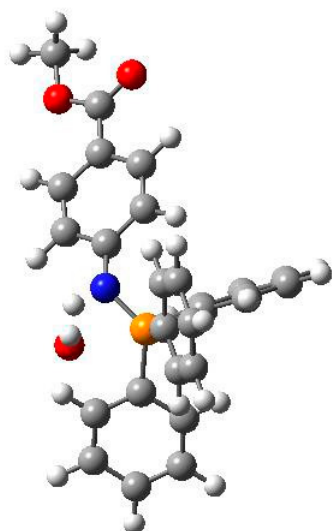

TS-3'

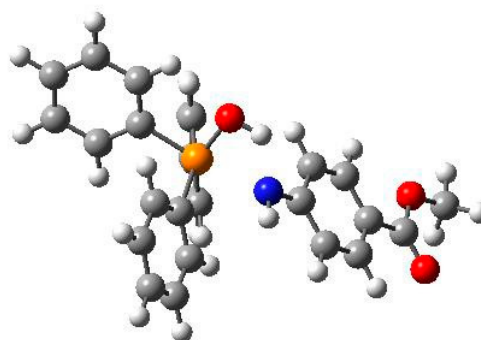

TS-4'

# Cartesian coordinates for all calculated structure

## SM

|   |          |          |          |
|---|----------|----------|----------|
| C | -0.65923 | -2.31311 | 2.36497  |
| C | 0.09787  | -1.55543 | 1.46874  |
| C | -0.49816 | -0.79324 | 0.45504  |
| C | -1.90512 | -0.85975 | 0.37497  |
| C | -2.66627 | -1.61293 | 1.26406  |
| C | -2.05237 | -2.35544 | 2.28176  |
| H | -0.15084 | -2.88086 | 3.14101  |
| H | 1.17953  | -1.5609  | 1.55836  |
| H | -3.74576 | -1.6177  | 1.15138  |
| S | -2.84763 | 0.07124  | -0.85375 |
| O | -4.27153 | -0.23899 | -0.6852  |
| O | -2.38052 | 1.46281  | -0.81876 |
| P | 0.51625  | 0.17399  | -0.78298 |
| C | 0.82792  | 1.7687   | 0.08524  |
| C | 1.11278  | 2.88321  | -0.71306 |
| C | 0.79604  | 1.94972  | 1.47947  |
| C | 1.38014  | 4.13593  | -0.15786 |
| H | 1.11966  | 2.78033  | -1.79538 |
| C | 1.05122  | 3.19073  | 2.04759  |
| H | 0.55841  | 1.11366  | 2.13028  |
| C | 1.34804  | 4.29361  | 1.2325   |
| H | 1.59552  | 4.97303  | -0.81206 |
| H | 1.02061  | 3.33501  | 3.12327  |

|   |          |          |          |
|---|----------|----------|----------|
| C | 2.14622  | -0.69417 | -0.68453 |
| C | 2.32841  | -1.8144  | -1.50764 |
| C | 3.23207  | -0.28256 | 0.1096   |
| C | 3.5294   | -2.52527 | -1.52941 |
| H | 1.51604  | -2.14554 | -2.15101 |
| C | 4.43846  | -0.97198 | 0.09065  |
| H | 3.13482  | 0.59104  | 0.74704  |
| C | 4.59514  | -2.10206 | -0.7252  |
| H | 3.62538  | -3.38946 | -2.1769  |
| H | 5.27809  | -0.65344 | 0.70106  |
| C | -2.88216 | -3.1776  | 3.23834  |
| H | -3.65834 | -2.56858 | 3.71635  |
| H | -3.39262 | -3.9974  | 2.71762  |
| H | -2.26383 | -3.61688 | 4.02717  |
| N | -2.40285 | -0.67917 | -2.30816 |
| H | -3.20172 | -0.63287 | -2.93954 |
| H | -1.58168 | -0.21679 | -2.69912 |
| O | 1.58305  | 5.46616  | 1.88682  |
| O | 5.81471  | -2.70911 | -0.66925 |
| C | 6.0328   | -3.85852 | -1.47281 |
| H | 7.05668  | -4.1763  | -1.26805 |
| H | 5.34178  | -4.67072 | -1.21128 |
| H | 5.93146  | -3.62915 | -2.54172 |
| C | 1.86078  | 6.62394  | 1.11424  |
| H | 1.02511  | 6.87357  | 0.44756  |
| H | 2.00482  | 7.43412  | 1.8313   |
| H | 2.77437  | 6.50169  | 0.51744  |

### **PPh<sub>3</sub>**

|   |          |          |          |
|---|----------|----------|----------|
| P | -0.00149 | 0.00827  | 0.00568  |
| C | -0.00236 | 0.00059  | 1.85991  |
| C | 1.25125  | -0.02909 | 2.49455  |
| C | -1.15523 | 0.059    | 2.65774  |
| C | 1.35015  | -0.02339 | 3.88554  |
| H | 2.15649  | -0.05228 | 1.8919   |
| C | -1.056   | 0.07664  | 4.05085  |
| H | -2.13498 | 0.0955   | 2.19094  |
| C | 0.19479  | 0.03166  | 4.66825  |
| H | 2.32875  | -0.05104 | 4.3579   |
| H | -1.95946 | 0.12469  | 4.6537   |
| H | 0.26977  | 0.04628  | 5.75243  |
| C | -1.74003 | 0.50905  | -0.39992 |
| C | -2.80714 | -0.38542 | -0.57443 |

|   |          |          |          |
|---|----------|----------|----------|
| C | -1.98116 | 1.88268  | -0.57104 |
| C | -4.08138 | 0.08303  | -0.9018  |
| H | -2.64116 | -1.45226 | -0.45832 |
| C | -3.25612 | 2.35188  | -0.88702 |
| H | -1.16082 | 2.58828  | -0.46036 |
| C | -4.31001 | 1.45145  | -1.05554 |
| H | -4.89648 | -0.62371 | -1.03628 |
| H | -3.42408 | 3.41851  | -1.01206 |
| H | -5.30216 | 1.81387  | -1.31166 |
| C | 0.00312  | -1.79997 | -0.40411 |
| C | 0.37297  | -2.15314 | -1.71286 |
| C | -0.3053  | -2.82438 | 0.50411  |
| C | 0.41349  | -3.48959 | -2.10979 |
| H | 0.63586  | -1.37341 | -2.4242  |
| C | -0.25437 | -4.16332 | 0.11009  |
| H | -0.58234 | -2.57616 | 1.52433  |
| C | 0.10134  | -4.49935 | -1.19709 |
| H | 0.69878  | -3.74271 | -3.12766 |
| H | -0.49408 | -4.94461 | 0.82709  |
| H | 0.14154  | -5.54204 | -1.50122 |

## H<sub>2</sub>O

|   |          |          |         |
|---|----------|----------|---------|
| H | -0.40071 | -2.67002 | 5.49892 |
| H | 0.41377  | -1.5515  | 6.13473 |
| O | 0.41958  | -2.16684 | 5.38634 |

## 4-CO<sub>2</sub>Me-PhN<sub>3</sub>

|   |          |          |          |
|---|----------|----------|----------|
| C | 0.25491  | 0.02685  | 1.74629  |
| C | 1.17692  | 0.34994  | 2.75194  |
| C | -0.5973  | -1.073   | 1.92356  |
| C | 1.24856  | -0.40965 | 3.91404  |
| H | 1.8376   | 1.19926  | 2.62011  |
| C | -0.53298 | -1.83726 | 3.07992  |
| H | -1.30639 | -1.31295 | 1.1384   |
| C | 0.39153  | -1.508   | 4.08116  |
| H | 1.96595  | -0.15131 | 4.68798  |
| H | -1.18653 | -2.69051 | 3.22837  |
| C | 0.13709  | 0.80672  | 0.48535  |
| O | -0.65276 | 0.5601   | -0.40554 |
| O | 1.01449  | 1.83653  | 0.43064  |
| C | 0.95063  | 2.63115  | -0.76341 |

|   |          |          |          |
|---|----------|----------|----------|
| H | -0.03871 | 3.08377  | -0.87121 |
| H | 1.7139   | 3.4006   | -0.64322 |
| H | 1.15724  | 2.01784  | -1.6445  |
| N | 0.3875   | -2.34153 | 5.22592  |
| N | 1.8631   | -1.98532 | 7.05119  |
| N | 1.18707  | -2.09365 | 6.13923  |

# **TS-1**

|   |          |          |          |
|---|----------|----------|----------|
| C | 3.74703  | 0.89881  | -2.5671  |
| C | 4.76462  | 0.07484  | -2.06065 |
| C | 2.52241  | 0.97396  | -1.9218  |
| C | 4.53577  | -0.66723 | -0.89635 |
| C | 3.30114  | -0.57916 | -0.25093 |
| C | 2.27981  | 0.24018  | -0.74259 |
| H | 5.30066  | -1.31659 | -0.48654 |
| H | 3.14328  | -1.16979 | 0.64494  |
| C | 0.45109  | 2.09466  | 0.5588   |
| C | 1.53003  | 2.99039  | 0.68208  |
| C | -0.83978 | 2.5684   | 0.83443  |
| C | 1.32306  | 4.30535  | 1.07581  |
| H | 2.5391   | 2.65654  | 0.46075  |
| C | -1.05953 | 3.88639  | 1.23564  |
| H | -1.6915  | 1.90107  | 0.72714  |
| C | 0.02622  | 4.76344  | 1.35795  |
| H | -2.0717  | 4.21688  | 1.43814  |
| P | 0.63155  | 0.34628  | 0.03221  |
| N | -0.57357 | 0.42203  | -1.87571 |
| N | -1.73423 | 0.2309   | -1.75367 |
| N | -2.53089 | -0.11961 | -0.7969  |
| H | 2.15053  | 5.00174  | 1.17003  |
| H | 3.93885  | 1.46315  | -3.4742  |
| C | 0.78859  | -0.57652 | 1.65033  |
| C | 0.49368  | -1.94273 | 1.82186  |
| C | 1.20103  | 0.12154  | 2.79805  |
| C | 0.62995  | -2.57796 | 3.05547  |
| C | 1.33247  | -0.51083 | 4.03272  |
| H | 1.43178  | 1.17844  | 2.72576  |
| C | 1.05009  | -1.87211 | 4.18702  |
| H | 0.40612  | -3.63817 | 3.11985  |
| H | 1.66678  | 0.06914  | 4.88991  |
| S | -0.08064 | -2.98895 | 0.46902  |
| O | 0.51672  | -2.44985 | -0.76268 |
| O | 0.12452  | -4.39553 | 0.82828  |

|   |           |          |          |
|---|-----------|----------|----------|
| H | 1.74482   | 1.60504  | -2.33884 |
| C | -3.9001   | -0.14045 | -1.11295 |
| C | -4.44321  | 0.17912  | -2.37257 |
| C | -4.76964  | -0.51255 | -0.07035 |
| C | -5.81521  | 0.12581  | -2.57667 |
| H | -3.7785   | 0.46341  | -3.18222 |
| C | -6.13944  | -0.5622  | -0.28181 |
| H | -4.34897  | -0.75487 | 0.90143  |
| C | -6.68226  | -0.24435 | -1.53606 |
| H | -6.22503  | 0.37101  | -3.55038 |
| H | -6.81441  | -0.84746 | 0.51857  |
| C | -8.15339  | -0.31715 | -1.70203 |
| O | -8.93772  | -0.6304  | -0.82524 |
| O | -8.55208  | 0.00744  | -2.95867 |
| C | -9.9669   | -0.04884 | -3.18213 |
| H | -10.11032 | 0.23701  | -4.225   |
| H | -10.34619 | -1.05923 | -3.00565 |
| H | -10.49118 | 0.64441  | -2.51847 |
| N | -1.73562  | -2.72344 | 0.54596  |
| H | -1.99264  | -1.83667 | 0.08548  |
| H | -2.21784  | -3.52082 | 0.13263  |
| C | 1.16693   | -2.55439 | 5.52809  |
| H | 1.92665   | -2.07666 | 6.15519  |
| H | 0.21575   | -2.50913 | 6.07455  |
| H | 1.42832   | -3.61154 | 5.41761  |
| O | 5.92655   | 0.06908  | -2.76926 |
| O | -0.06928  | 6.06677  | 1.73469  |
| C | -1.35629  | 6.59661  | 2.0229   |
| H | -1.82877  | 6.07116  | 2.86272  |
| H | -1.19362  | 7.64059  | 2.29548  |
| H | -2.01635  | 6.54805  | 1.1475   |
| C | 6.98572   | -0.76569 | -2.32353 |
| H | 6.68939   | -1.82246 | -2.31666 |
| H | 7.79846   | -0.62261 | -3.03762 |
| H | 7.32939   | -0.47964 | -1.3208  |

# **TS-1'**

|   |         |          |          |
|---|---------|----------|----------|
| C | 3.83731 | 0.32825  | -2.65321 |
| C | 4.8944  | -0.07985 | -1.83754 |
| C | 2.56344 | 0.50362  | -2.11277 |
| C | 4.6744  | -0.31352 | -0.4787  |
| C | 3.40223 | -0.13506 | 0.06659  |
| C | 2.33515 | 0.28134  | -0.74499 |



|   |           |          |          |
|---|-----------|----------|----------|
| H | 5.49303   | -0.63695 | 0.15877  |
| H | 3.2374    | -0.32636 | 1.12277  |
| C | 0.59988   | 2.31463  | 0.43412  |
| C | 1.76617   | 3.05219  | 0.69672  |
| C | -0.65156  | 2.93946  | 0.56192  |
| C | 1.67729   | 4.38609  | 1.0958   |
| H | 2.74112   | 2.5872   | 0.58929  |
| C | -0.73364  | 4.27111  | 0.96955  |
| H | -1.55025  | 2.37573  | 0.32686  |
| C | 0.42912   | 4.99652  | 1.23573  |
| H | -1.70682  | 4.7448   | 1.0662   |
| P | 0.63858   | 0.55485  | -0.10412 |
| N | -0.50434  | -0.45576 | -1.83479 |
| N | -1.66993  | -0.34194 | -1.63525 |
| N | -2.40129  | 0.23385  | -0.75291 |
| H | 2.58527   | 4.94846  | 1.29713  |
| H | 0.36416   | 6.03684  | 1.54327  |
| H | 4.00127   | 0.50118  | -3.71333 |
| H | 5.88526   | -0.22208 | -2.26057 |
| C | 0.53744   | -0.46122 | 1.42019  |
| C | 0.49305   | -1.85884 | 1.27408  |
| C | 0.44993   | 0.09467  | 2.70465  |
| C | 0.38092   | -2.68084 | 2.39347  |
| C | 0.33104   | -0.7337  | 3.8223   |
| H | 0.47383   | 1.17202  | 2.8336   |
| C | 0.29855   | -2.12015 | 3.67063  |
| H | 0.34924   | -3.7597  | 2.26784  |
| H | 0.26482   | -0.29155 | 4.81286  |
| H | 1.73871   | 0.79711  | -2.75542 |
| C | -3.78786  | 0.0881   | -0.89477 |
| C | -4.42567  | -0.5819  | -1.95795 |
| C | -4.57974  | 0.66967  | 0.11305  |
| C | -5.81012  | -0.66248 | -2.0062  |
| H | -3.82226  | -1.03279 | -2.73961 |
| C | -5.96258  | 0.58567  | 0.05885  |
| H | -4.08551  | 1.17624  | 0.93665  |
| C | -6.59854  | -0.08004 | -1.00035 |
| H | -6.29203  | -1.17887 | -2.82923 |
| H | -6.57675  | 1.03147  | 0.83454  |
| C | -8.07878  | -0.13599 | -1.00501 |
| O | -8.79766  | 0.35612  | -0.15428 |
| O | -8.57202  | -0.80686 | -2.07866 |
| C | -10.00108 | -0.89304 | -2.13727 |
| H | -10.22393 | -1.45513 | -3.04527 |

|   |           |          |          |
|---|-----------|----------|----------|
| H | -10.39401 | -1.41228 | -1.25861 |
| H | -10.44748 | 0.10427  | -2.18444 |
| H | 0.20461   | -2.76207 | 4.54231  |
| H | 0.54128   | -2.30166 | 0.28274  |

# Int-1

|   |          |          |          |
|---|----------|----------|----------|
| C | 4.09286  | 0.82398  | -1.96828 |
| C | 2.87471  | 1.04975  | -1.3264  |
| C | 2.09653  | -0.00266 | -0.82322 |
| C | 2.60029  | -1.31405 | -0.99795 |
| C | 3.81397  | -1.53069 | -1.64231 |
| C | 4.58178  | -0.46988 | -2.14403 |
| H | 4.66186  | 1.67273  | -2.33902 |
| H | 2.52256  | 2.07009  | -1.22399 |
| H | 4.16318  | -2.55361 | -1.74085 |
| S | 1.8243   | -2.82448 | -0.34337 |
| O | 2.78048  | -3.928   | -0.49606 |
| O | 1.33368  | -2.48796 | 1.0003   |
| P | 0.50139  | 0.4463   | -0.03154 |
| C | 0.70172  | 0.4715   | 1.77274  |
| C | -0.44294 | 0.64083  | 2.57683  |
| C | 1.94837  | 0.33068  | 2.3897   |
| C | -0.33149 | 0.67434  | 3.95722  |
| H | -1.42194 | 0.7265   | 2.11503  |
| C | 2.0701   | 0.36953  | 3.77869  |
| H | 2.84004  | 0.17412  | 1.79154  |
| C | 0.92638  | 0.54021  | 4.56913  |
| H | -1.20569 | 0.79457  | 4.5889   |
| H | 3.04888  | 0.25032  | 4.22807  |
| C | 0.11151  | 2.16247  | -0.50405 |
| C | -0.59032 | 2.38956  | -1.69607 |
| C | 0.47956  | 3.26864  | 0.28459  |
| C | -0.91743 | 3.68161  | -2.10369 |
| H | -0.89835 | 1.54582  | -2.30553 |
| C | 0.164    | 4.55876  | -0.11468 |
| H | 1.00662  | 3.11704  | 1.22162  |
| C | -0.53901 | 4.77539  | -1.31181 |
| H | -1.46906 | 3.82306  | -3.02575 |
| H | 0.43803  | 5.41863  | 0.48819  |
| N | -0.58628 | -0.60885 | -0.67939 |
| N | -1.85234 | -0.37295 | -0.27098 |
| N | -2.6583  | -1.25036 | -0.71419 |
| C | -4.0043  | -1.00576 | -0.36628 |

|   |           |          |          |
|---|-----------|----------|----------|
| C | -4.88869  | -2.08243 | -0.54711 |
| C | -4.51415  | 0.22393  | 0.09719  |
| C | -6.24014  | -1.95179 | -0.25267 |
| H | -4.48398  | -3.0193  | -0.91737 |
| C | -5.86382  | 0.35312  | 0.38765  |
| H | -3.83928  | 1.06446  | 0.2126   |
| C | -6.74287  | -0.72997 | 0.21986  |
| H | -6.9127   | -2.79129 | -0.38911 |
| H | -6.26855  | 1.29563  | 0.74287  |
| C | -8.17558  | -0.52218 | 0.54404  |
| O | -8.65409  | 0.52289  | 0.94557  |
| O | -8.92234  | -1.63863 | 0.34601  |
| C | -10.31669 | -1.49905 | 0.64561  |
| H | -10.77112 | -0.72474 | 0.02112  |
| H | -10.76108 | -2.47224 | 0.43258  |
| H | -10.46176 | -1.2329  | 1.69641  |
| C | 5.88628   | -0.73895 | -2.85242 |
| H | 6.53182   | -1.39585 | -2.25852 |
| H | 5.71414   | -1.24062 | -3.81278 |
| H | 6.43296   | 0.18755  | -3.05192 |
| N | 0.61614   | -3.09044 | -1.46665 |
| H | -0.1372   | -2.39611 | -1.3192  |
| H | 0.30013   | -4.05668 | -1.3902  |
| O | -0.80557  | 6.07208  | -1.60915 |
| O | 0.92647   | 0.58846  | 5.92666  |
| C | -1.53921  | 6.36318  | -2.79315 |
| H | -1.64075  | 7.44906  | -2.81892 |
| H | -1.00338  | 6.02608  | -3.68936 |
| H | -2.53528  | 5.90421  | -2.76938 |
| C | 2.15962   | 0.4183   | 6.61279  |
| H | 1.9189    | 0.47902  | 7.67528  |
| H | 2.60718   | -0.5597  | 6.39583  |
| H | 2.87471   | 1.21068  | 6.35656  |

#### Int-1'

|   |         |          |          |
|---|---------|----------|----------|
| C | 4.1657  | 0.0336   | -2.26907 |
| C | 5.11649 | -0.03134 | -1.24918 |
| H | 2.06464 | 0.23238  | -2.74557 |
| C | 2.81423 | 0.20001  | -1.96303 |
| C | 4.7151  | 0.06561  | 0.08501  |
| C | 3.36653 | 0.23067  | 0.39797  |
| C | 2.4074  | 0.30338  | -0.62407 |
| H | 5.45028 | 0.0066   | 0.88283  |

|   |           |          |          |
|---|-----------|----------|----------|
| H | 3.06258   | 0.29018  | 1.43914  |
| C | 0.46625   | 2.31413  | 0.2506   |
| C | -0.69666  | 2.77582  | 0.89188  |
| C | 1.47327   | 3.23335  | -0.08617 |
| C | -0.83503  | 4.12682  | 1.20389  |
| H | -1.49169  | 2.07713  | 1.12267  |
| C | 1.32312   | 4.58634  | 0.22024  |
| H | 2.37468   | 2.8968   | -0.58687 |
| C | 0.1722    | 5.0347   | 0.86837  |
| H | 2.10882   | 5.28739  | -0.04744 |
| P | 0.64391   | 0.55234  | -0.22258 |
| N | -0.08328  | 0.03843  | -1.65943 |
| N | -1.39545  | 0.01684  | -1.73003 |
| N | -2.04266  | 0.37301  | -0.68194 |
| H | -1.73757  | 4.47194  | 1.7006   |
| H | 0.05697   | 6.08858  | 1.10704  |
| H | 4.47378   | -0.04989 | -3.30767 |
| H | 6.16755   | -0.1631  | -1.49197 |
| C | 0.31978   | -0.48078 | 1.25168  |
| C | 0.00527   | -1.83242 | 1.04387  |
| C | 0.41625   | 0.01468  | 2.55951  |
| C | -0.20847  | -2.67498 | 2.13271  |
| C | 0.20215   | -0.83546 | 3.64648  |
| H | 0.6465    | 1.06133  | 2.73341  |
| C | -0.10979  | -2.17877 | 3.43516  |
| H | -0.45909  | -3.71855 | 1.9642   |
| H | 0.27608   | -0.4441  | 4.6575   |
| C | -3.44386  | 0.34622  | -0.81821 |
| C | -4.12685  | 0.22398  | -2.04526 |
| C | -4.19194  | 0.47988  | 0.36504  |
| C | -5.51375  | 0.22946  | -2.07664 |
| H | -3.55056  | 0.12773  | -2.95819 |
| C | -5.5795   | 0.48518  | 0.32929  |
| H | -3.66083  | 0.56142  | 1.30913  |
| C | -6.25846  | 0.36098  | -0.89147 |
| H | -6.0338   | 0.13702  | -3.02396 |
| H | -6.16154  | 0.58323  | 1.23995  |
| C | -7.74091  | 0.37696  | -0.87147 |
| O | -8.42343  | 0.48911  | 0.13068  |
| O | -8.28041  | 0.25102  | -2.11149 |
| C | -9.71249  | 0.25919  | -2.15578 |
| H | -10.10694 | 1.19725  | -1.75508 |
| H | -9.97374  | 0.1535   | -3.20965 |
| H | -10.12264 | -0.57113 | -1.57402 |

|   |          |          |         |
|---|----------|----------|---------|
| H | -0.08399 | -2.21517 | 0.0312  |
| H | -0.28007 | -2.83739 | 4.28242 |

## TS-2

|   |          |          |          |
|---|----------|----------|----------|
| C | -0.3627  | 3.93372  | -3.18306 |
| C | 0.24389  | 4.8802   | -2.34233 |
| H | -1.06023 | 1.9312   | -3.40552 |
| C | -0.5634  | 2.6325   | -2.74822 |
| C | 0.6518   | 4.49649  | -1.06053 |
| C | 0.47194  | 3.17696  | -0.64502 |
| C | -0.1437  | 2.22176  | -1.46742 |
| H | 1.12986  | 5.19954  | -0.38868 |
| H | 0.82498  | 2.90416  | 0.34316  |
| C | -1.90524 | 0.6017   | 0.30951  |
| C | -2.52535 | -0.58315 | 0.72414  |
| C | -2.45576 | 1.82552  | 0.72709  |
| C | -3.65315 | -0.56256 | 1.5452   |
| H | -2.13087 | -1.53976 | 0.39489  |
| C | -3.57837 | 1.85769  | 1.54319  |
| H | -2.00931 | 2.76195  | 0.41003  |
| C | -4.18625 | 0.66423  | 1.96101  |
| H | -4.00856 | 2.80015  | 1.86725  |
| P | -0.45493 | 0.51407  | -0.81277 |
| N | -1.84731 | 0.13615  | -2.40597 |
| N | -1.49294 | -0.99112 | -2.54254 |
| N | -0.29949 | -1.12515 | -1.4278  |
| H | -4.10737 | -1.50058 | 1.84283  |
| H | -0.67859 | 4.24645  | -4.17339 |
| C | 1.00184  | 0.40796  | 0.40189  |
| C | 2.38478  | 0.40364  | 0.09069  |
| C | 0.69344  | 0.26944  | 1.76608  |
| C | 3.35541  | 0.21949  | 1.07934  |
| C | 1.66577  | 0.11189  | 2.75417  |
| H | -0.34472 | 0.27408  | 2.07406  |
| C | 3.02019  | 0.06678  | 2.42839  |
| H | 4.39886  | 0.18671  | 0.78198  |
| H | 1.35425  | 0.01371  | 3.79147  |
| C | 0.55495  | -2.22505 | -1.30999 |
| C | 0.87926  | -2.91582 | -2.50094 |
| C | 1.03236  | -2.74424 | -0.08807 |
| C | 1.65179  | -4.07004 | -2.4702  |
| H | 0.48301  | -2.5467  | -3.44165 |
| C | 1.83163  | -3.879   | -0.06968 |

|   |          |          |          |
|---|----------|----------|----------|
| H | 0.77585  | -2.25303 | 0.84242  |
| C | 2.15088  | -4.55817 | -1.25399 |
| H | 1.8829   | -4.59153 | -3.39252 |
| H | 2.20841  | -4.27234 | 0.86909  |
| C | 2.99923  | -5.77222 | -1.15937 |
| O | 3.44439  | -6.22792 | -0.12243 |
| O | 3.23456  | -6.33651 | -2.36991 |
| C | 4.05516  | -7.51225 | -2.34539 |
| H | 3.58778  | -8.29657 | -1.7436  |
| H | 4.14397  | -7.82884 | -3.38534 |
| H | 5.03995  | -7.28652 | -1.9272  |
| C | 4.09029  | -0.14736 | 3.47048  |
| H | 3.6815   | -0.07224 | 4.48273  |
| H | 4.54677  | -1.13976 | 3.36732  |
| H | 4.89583  | 0.58913  | 3.37296  |
| S | 3.17065  | 0.76691  | -1.5077  |
| O | 4.33977  | -0.11281 | -1.61008 |
| O | 3.33036  | 2.21944  | -1.63294 |
| N | 2.02408  | 0.32966  | -2.65383 |
| H | 1.99978  | 1.03223  | -3.38936 |
| H | 2.18796  | -0.61184 | -3.0064  |
| O | -5.27908 | 0.8043   | 2.7597   |
| O | 0.38568  | 6.12783  | -2.86053 |
| C | 1.02049  | 7.12224  | -2.06733 |
| H | 1.03655  | 8.02519  | -2.67977 |
| H | 0.45869  | 7.31917  | -1.14513 |
| H | 2.04847  | 6.83547  | -1.81268 |
| C | -5.95381 | -0.36807 | 3.19426  |
| H | -6.78816 | -0.02171 | 3.80637  |
| H | -6.34091 | -0.94698 | 2.34597  |
| H | -5.29967 | -1.00784 | 3.80083  |

#### TS-2'

|   |          |         |          |
|---|----------|---------|----------|
| C | 0.43584  | 3.5651  | -2.38731 |
| C | 0.69471  | 4.44682 | -1.33826 |
| H | -0.27643 | 1.62143 | -2.95415 |
| C | -0.05252 | 2.28349 | -2.12749 |
| C | 0.47922  | 4.03709 | -0.02126 |
| C | 0.02213  | 2.74677 | 0.24448  |
| C | -0.26257 | 1.85719 | -0.80706 |
| H | 0.67861  | 4.71632 | 0.8032   |
| H | -0.10939 | 2.43388 | 1.27498  |
| C | -2.59156 | 0.19352 | 0.27414  |

|   |          |          |          |
|---|----------|----------|----------|
| C | -3.23797 | -1.0214  | 0.54751  |
| C | -3.27449 | 1.399    | 0.48422  |
| C | -4.54253 | -1.027   | 1.04062  |
| H | -2.72847 | -1.96349 | 0.36513  |
| C | -4.57949 | 1.38665  | 0.97871  |
| H | -2.79426 | 2.34594  | 0.25939  |
| C | -5.215   | 0.17659  | 1.26058  |
| H | -5.10008 | 2.32685  | 1.13953  |
| P | -0.8947  | 0.15217  | -0.42364 |
| N | -1.77041 | 0.02578  | -2.32525 |
| N | -1.27052 | -1.04269 | -2.55494 |
| N | -0.41471 | -1.31401 | -1.25437 |
| H | -5.03379 | -1.97371 | 1.24801  |
| H | -6.2318  | 0.17069  | 1.64349  |
| H | 0.6039   | 3.87426  | -3.41522 |
| H | 1.06412  | 5.44783  | -1.54454 |
| C | 0.15631  | -0.13602 | 1.10055  |
| C | 1.55357  | -0.2004  | 0.95547  |
| C | -0.38343 | -0.24374 | 2.38998  |
| C | 2.38136  | -0.38592 | 2.06012  |
| C | 0.44717  | -0.42773 | 3.50039  |
| H | -1.45692 | -0.18846 | 2.53761  |
| C | 1.8293   | -0.50226 | 3.33871  |
| H | 3.45803  | -0.44146 | 1.92363  |
| H | 0.00777  | -0.51165 | 4.49098  |
| H | 2.4743   | -0.64759 | 4.20109  |
| H | 1.9993   | -0.10915 | -0.03159 |
| C | 0.22205  | -2.53772 | -0.98303 |
| C | 0.91423  | -3.14652 | -2.04945 |
| C | 0.13407  | -3.22201 | 0.24496  |
| C | 1.49424  | -4.39852 | -1.89435 |
| H | 0.97716  | -2.62455 | -2.9982  |
| C | 0.74619  | -4.45837 | 0.40245  |
| H | -0.40137 | -2.77813 | 1.0756   |
| C | 1.42748  | -5.06533 | -0.66177 |
| H | 2.01792  | -4.85858 | -2.72494 |
| H | 0.69141  | -4.98378 | 1.35044  |
| C | 2.0467   | -6.39403 | -0.43044 |
| O | 2.01674  | -7.0001  | 0.62457  |
| O | 2.66477  | -6.87883 | -1.53669 |
| C | 3.28297  | -8.16242 | -1.37608 |
| H | 2.54055  | -8.91666 | -1.10096 |
| H | 3.72647  | -8.39705 | -2.34457 |
| H | 4.05234  | -8.12623 | -0.59982 |

## Int-2

|   |          |          |          |
|---|----------|----------|----------|
| C | 0.14728  | -0.74667 | -3.80526 |
| C | 0.31733  | -2.13678 | -3.81635 |
| H | 0.07673  | 1.02281  | -2.59813 |
| C | 0.24214  | -0.04906 | -2.60164 |
| C | 0.57575  | -2.81658 | -2.61437 |
| C | 0.66784  | -2.11218 | -1.42354 |
| C | 0.51876  | -0.713   | -1.40252 |
| H | 0.68393  | -3.89616 | -2.6417  |
| H | 0.84083  | -2.66075 | -0.50131 |
| C | 2.377    | 0.16102  | 0.69004  |
| C | 2.77914  | 1.04111  | 1.70606  |
| C | 3.34246  | -0.69024 | 0.12352  |
| C | 4.09492  | 1.06836  | 2.16348  |
| H | 2.05657  | 1.72618  | 2.13993  |
| C | 4.65627  | -0.67266 | 0.57115  |
| H | 3.07122  | -1.3662  | -0.68056 |
| C | 5.04331  | 0.20534  | 1.59582  |
| H | 5.40708  | -1.32466 | 0.13605  |
| P | 0.63049  | 0.24873  | 0.14227  |
| N | 0.09376  | 1.75955  | 0.11692  |
| H | 4.37025  | 1.76575  | 2.94607  |
| H | -0.0742  | -0.20283 | -4.71591 |
| C | -0.34378 | -0.68133 | 1.40857  |
| C | -1.75277 | -0.69649 | 1.54121  |
| C | 0.37875  | -1.47018 | 2.31544  |
| C | -2.37538 | -1.45746 | 2.52504  |
| C | -0.25146 | -2.23668 | 3.29768  |
| H | 1.46108  | -1.48838 | 2.26189  |
| C | -1.63918 | -2.24254 | 3.42374  |
| H | -3.4592  | -1.4339  | 2.57837  |
| H | 0.35601  | -2.83374 | 3.97328  |
| S | -2.90701 | 0.18377  | 0.44958  |
| O | -2.45636 | -0.03994 | -0.93121 |
| O | -4.27621 | -0.19209 | 0.81977  |
| N | -2.67855 | 1.75852  | 0.97588  |
| H | -1.73745 | 2.05477  | 0.65765  |
| C | -2.34055 | -3.05065 | 4.48732  |
| H | -2.79513 | -2.39662 | 5.24195  |
| H | -3.14775 | -3.65497 | 4.05823  |
| H | -1.64738 | -3.72314 | 5.00158  |
| C | 0.71754  | 2.87252  | -0.42812 |



|   |          |          |          |
|---|----------|----------|----------|
| C | 1.83058  | 2.85343  | -1.30506 |
| C | 0.19392  | 4.14441  | -0.08479 |
| C | 2.3789   | 4.02812  | -1.80338 |
| H | 2.26712  | 1.90433  | -1.60069 |
| C | 0.741    | 5.3125   | -0.58586 |
| H | -0.6483  | 4.18819  | 0.60037  |
| C | 1.84464  | 5.27745  | -1.45521 |
| H | 3.2307   | 3.98054  | -2.47364 |
| H | 0.32853  | 6.27861  | -0.31202 |
| C | 2.38741  | 6.55661  | -1.95657 |
| O | 1.95596  | 7.66037  | -1.67334 |
| O | 3.44961  | 6.38421  | -2.79091 |
| C | 4.01527  | 7.59331  | -3.3086  |
| H | 4.38127  | 8.22975  | -2.49772 |
| H | 4.84048  | 7.28049  | -3.95035 |
| H | 3.27361  | 8.15373  | -3.88501 |
| H | -3.42687 | 2.34064  | 0.59876  |
| O | 0.24411  | -2.91659 | -4.92677 |
| O | 6.34987  | 0.14612  | 1.96019  |
| C | -0.06163 | -2.29893 | -6.17046 |
| H | 0.70481  | -1.5666  | -6.45467 |
| H | -0.08087 | -3.1053  | -6.90531 |
| H | -1.04203 | -1.80725 | -6.14308 |
| C | 6.81404  | 1.0277   | 2.97543  |
| H | 6.29719  | 0.85101  | 3.92721  |
| H | 7.87625  | 0.80913  | 3.09468  |
| H | 6.68861  | 2.07749  | 2.68239  |

#### Int-2'

|   |          |          |          |
|---|----------|----------|----------|
| P | -0.38023 | -0.01783 | -0.06715 |
| C | 0.05732  | 0.1075   | 1.70055  |
| C | 1.36813  | 0.46708  | 2.04403  |
| C | -0.87639 | -0.15774 | 2.71269  |
| C | 1.74077  | 0.54584  | 3.3854   |
| H | 2.07226  | 0.70176  | 1.25268  |
| C | -0.4974  | -0.07908 | 4.05385  |
| H | -1.90392 | -0.40444 | 2.45952  |
| C | 0.8114   | 0.26939  | 4.39099  |
| H | 2.75709  | 0.82865  | 3.64584  |
| H | -1.22737 | -0.28013 | 4.83325  |
| H | 1.10433  | 0.33395  | 5.43552  |
| C | -2.16461 | 0.42033  | -0.17325 |
| C | -3.18549 | -0.51829 | -0.37862 |

|   |          |          |          |
|---|----------|----------|----------|
| C | -2.49279 | 1.78289  | -0.07177 |
| C | -4.51576 | -0.10154 | -0.46641 |
| H | -2.94558 | -1.57235 | -0.4765  |
| C | -3.82088 | 2.19431  | -0.16119 |
| H | -1.70402 | 2.51777  | 0.06405  |
| C | -4.83438 | 1.25224  | -0.35647 |
| H | -5.30063 | -0.83596 | -0.62595 |
| H | -4.06496 | 3.25023  | -0.08472 |
| H | -5.86951 | 1.57494  | -0.42894 |
| C | -0.25824 | -1.80214 | -0.50433 |
| C | 0.29849  | -2.14417 | -1.74579 |
| C | -0.66145 | -2.82357 | 0.37068  |
| C | 0.42704  | -3.48433 | -2.11349 |
| H | 0.63808  | -1.36423 | -2.41953 |
| C | -0.53121 | -4.16182 | -0.00069 |
| H | -1.06181 | -2.57915 | 1.35028  |
| C | 0.00999  | -4.49363 | -1.24465 |
| H | 0.85928  | -3.73778 | -3.07751 |
| H | -0.84393 | -4.94454 | 0.68519  |
| H | 0.11436  | -5.53665 | -1.53117 |
| N | 0.63051  | 0.92819  | -0.84069 |
| C | 0.62356  | 1.41726  | -2.12995 |
| C | -0.3657  | 1.15486  | -3.11194 |
| C | 1.69643  | 2.26419  | -2.50762 |
| C | -0.28463 | 1.706    | -4.38404 |
| H | -1.20997 | 0.51647  | -2.86603 |
| C | 1.77431  | 2.80844  | -3.77688 |
| H | 2.45995  | 2.4746   | -1.76473 |
| C | 0.78541  | 2.5408   | -4.74054 |
| H | -1.05702 | 1.48819  | -5.11429 |
| H | 2.60221  | 3.45448  | -4.0523  |
| C | 0.92207  | 3.14953  | -6.07828 |
| O | 1.83212  | 3.88075  | -6.42839 |
| O | -0.09654 | 2.80845  | -6.91707 |
| C | -0.0134  | 3.37314  | -8.22941 |
| H | -0.89258 | 3.00811  | -8.76302 |
| H | -0.02014 | 4.46609  | -8.18429 |
| H | 0.90159  | 3.05047  | -8.73478 |

### TS-3

|   |          |          |          |
|---|----------|----------|----------|
| C | 1.12079  | -0.56673 | -3.8814  |
| C | -0.18266 | -0.94407 | -4.24594 |
| H | 2.44815  | -0.05834 | -2.29329 |

|   |          |          |          |
|---|----------|----------|----------|
| C | 1.43717  | -0.3563  | -2.54933 |
| C | -1.16128 | -1.1032  | -3.25612 |
| C | -0.83733 | -0.88574 | -1.91877 |
| C | 0.46277  | -0.52092 | -1.5418  |
| H | -2.17723 | -1.37936 | -3.51188 |
| H | -1.61788 | -0.9665  | -1.17328 |
| C | 2.50599  | -0.89707 | 0.49774  |
| C | 3.29276  | -0.35223 | 1.52199  |
| C | 2.99644  | -2.01664 | -0.20234 |
| C | 4.53625  | -0.89296 | 1.84537  |
| H | 2.93148  | 0.51732  | 2.06302  |
| C | 4.23215  | -2.5631  | 0.11061  |
| H | 2.41053  | -2.45997 | -1.00138 |
| C | 5.01294  | -2.00572 | 1.13746  |
| H | 4.62103  | -3.42106 | -0.42836 |
| P | 0.86542  | -0.16248 | 0.18981  |
| N | 0.90963  | 1.42993  | 0.60164  |
| H | 5.12108  | -0.44282 | 2.63892  |
| H | 1.86293  | -0.43837 | -4.66259 |
| C | -0.31364 | -1.03766 | 1.30196  |
| C | -1.57771 | -0.57226 | 1.74732  |
| C | 0.08351  | -2.32288 | 1.70643  |
| C | -2.36851 | -1.384   | 2.55601  |
| C | -0.72661 | -3.12509 | 2.50876  |
| H | 1.04579  | -2.7152  | 1.39905  |
| C | -1.96816 | -2.668   | 2.9503   |
| H | -3.32677 | -0.98401 | 2.8736   |
| H | -0.37738 | -4.11422 | 2.79402  |
| S | -2.27744 | 1.08088  | 1.34977  |
| O | -2.25856 | 1.11289  | -0.12771 |
| O | -3.56938 | 1.12688  | 2.0573   |
| N | -1.20929 | 2.14543  | 1.88682  |
| H | -1.32607 | 2.2895   | 2.88945  |
| C | 1.42851  | 2.44742  | -0.24409 |
| C | 2.75892  | 2.44506  | -0.69889 |
| C | 0.59122  | 3.52386  | -0.59057 |
| C | 3.23735  | 3.48379  | -1.49166 |
| H | 3.42663  | 1.63941  | -0.41167 |
| C | 1.07955  | 4.56457  | -1.36915 |
| H | -0.43764 | 3.5168   | -0.24713 |
| C | 2.40358  | 4.55666  | -1.83378 |
| H | 4.26535  | 3.47257  | -1.83704 |
| H | 0.43805  | 5.39597  | -1.64283 |
| C | 2.86284  | 5.6935   | -2.67022 |

|   |          |          |          |
|---|----------|----------|----------|
| O | 2.17723  | 6.64739  | -2.98577 |
| O | 4.15773  | 5.56295  | -3.06075 |
| C | 4.65786  | 6.6345   | -3.87075 |
| H | 5.69291  | 6.37355  | -4.09593 |
| H | 4.07619  | 6.72695  | -4.79214 |
| H | 4.61071  | 7.58337  | -3.32907 |
| H | 0.00129  | 1.79636  | 1.25738  |
| C | -2.85935 | -3.51182 | 3.82765  |
| H | -3.8523  | -3.63409 | 3.37937  |
| H | -2.4358  | -4.50716 | 3.99295  |
| H | -3.00722 | -3.04051 | 4.80704  |
| O | -0.39011 | -1.12831 | -5.57359 |
| O | 6.20481  | -2.61174 | 1.36223  |
| C | -1.6996  | -1.4652  | -6.0177  |
| H | -2.42464 | -0.68737 | -5.74907 |
| H | -1.63304 | -1.54073 | -7.10403 |
| H | -2.02729 | -2.42777 | -5.60525 |
| C | 7.04918  | -2.09966 | 2.38725  |
| H | 7.93609  | -2.73469 | 2.38449  |
| H | 7.3426   | -1.06258 | 2.18256  |
| H | 6.564    | -2.15516 | 3.36965  |

### TS-3'

|   |          |          |          |
|---|----------|----------|----------|
| C | 1.7589   | 2.62885  | -2.00912 |
| C | 1.16041  | 3.87914  | -1.84061 |
| H | 1.58332  | 0.50595  | -1.69119 |
| C | 1.11975  | 1.47788  | -1.54693 |
| C | -0.08272 | 3.9744   | -1.21209 |
| C | -0.72818 | 2.82696  | -0.74989 |
| C | -0.12774 | 1.57132  | -0.91222 |
| H | -0.55685 | 4.94394  | -1.08575 |
| H | -1.70169 | 2.90782  | -0.27664 |
| C | -2.65841 | 0.32231  | 0.25677  |
| C | -3.76901 | -0.11574 | -0.48104 |
| C | -2.86411 | 0.96123  | 1.49174  |
| C | -5.05639 | 0.07068  | 0.02175  |
| H | -3.61078 | -0.55582 | -1.45634 |
| C | -4.1574  | 1.17286  | 1.97198  |
| H | -2.01956 | 1.2922   | 2.08718  |
| C | -5.25586 | 0.71844  | 1.24235  |
| H | -4.30101 | 1.68088  | 2.92176  |
| P | -0.93001 | 0.04124  | -0.31889 |
| N | -0.58829 | -1.33721 | -1.18119 |

|   |          |          |          |
|---|----------|----------|----------|
| H | -5.90876 | -0.28091 | -0.55336 |
| H | -6.26289 | 0.86988  | 1.62238  |
| H | 2.72309  | 2.54642  | -2.50331 |
| H | 1.65853  | 4.77464  | -2.20184 |
| C | -0.11158 | -0.26106 | 1.3232   |
| C | 0.87968  | 0.57852  | 1.84917  |
| C | -0.51193 | -1.38123 | 2.07267  |
| C | 1.46304  | 0.30173  | 3.08938  |
| C | 0.07196  | -1.65897 | 3.30614  |
| H | -1.28329 | -2.04251 | 1.68763  |
| C | 1.06311  | -0.81709 | 3.81803  |
| H | 2.23057  | 0.9636   | 3.48171  |
| H | -0.24494 | -2.53338 | 3.8679   |
| H | 1.51874  | -1.03376 | 4.78049  |
| H | 1.20422  | 1.45285  | 1.29482  |
| C | 0.23565  | -2.45347 | -0.99091 |
| C | -0.22066 | -3.68569 | -1.50248 |
| C | 1.51671  | -2.40869 | -0.40587 |
| C | 0.56557  | -4.82718 | -1.429   |
| H | -1.20606 | -3.72498 | -1.95749 |
| C | 2.29313  | -3.55685 | -0.31916 |
| H | 1.90335  | -1.47146 | -0.02213 |
| C | 1.83294  | -4.77947 | -0.82739 |
| H | 0.19706  | -5.76537 | -1.82915 |
| H | 3.27906  | -3.52218 | 0.13329  |
| C | 2.71491  | -5.96471 | -0.70897 |
| O | 3.81855  | -5.96343 | -0.19482 |
| O | 2.15871  | -7.08281 | -1.2426  |
| C | 2.966    | -8.26387 | -1.15743 |
| H | 3.18555  | -8.50819 | -0.11431 |
| H | 2.37609  | -9.05618 | -1.62025 |
| H | 3.91     | -8.12654 | -1.69227 |
| O | -1.89074 | 0.1053   | -2.46393 |
| H | -1.15734 | -1.01725 | -2.12023 |
| H | -1.35775 | 0.69213  | -3.02237 |

### Int-3

|   |          |          |          |
|---|----------|----------|----------|
| C | 0.40183  | -1.34706 | -3.63674 |
| C | -0.88684 | -1.75855 | -4.01684 |
| H | 1.69349  | -0.79504 | -2.03494 |
| C | 0.69277  | -1.11591 | -2.30248 |
| C | -1.87624 | -1.93169 | -3.03998 |
| C | -1.57909 | -1.69139 | -1.70081 |

|   |          |          |          |
|---|----------|----------|----------|
| C | -0.29424 | -1.28996 | -1.30862 |
| H | -2.8811  | -2.23537 | -3.30788 |
| H | -2.36791 | -1.78104 | -0.96585 |
| C | 1.72815  | -1.65033 | 0.74587  |
| C | 2.51038  | -1.0987  | 1.77024  |
| C | 2.22038  | -2.77551 | 0.05569  |
| C | 3.75296  | -1.63678 | 2.10073  |
| H | 2.14625  | -0.22713 | 2.30558  |
| C | 3.45466  | -3.31964 | 0.37694  |
| H | 1.63691  | -3.22451 | -0.74182 |
| C | 4.2322   | -2.75456 | 1.40229  |
| H | 3.84501  | -4.18179 | -0.15414 |
| P | 0.08394  | -0.93612 | 0.42754  |
| N | 0.16081  | 0.67082  | 0.84913  |
| H | 4.33478  | -1.18121 | 2.89332  |
| H | 1.15313  | -1.21035 | -4.40763 |
| C | -1.09717 | -1.79229 | 1.54364  |
| C | -2.37916 | -1.32898 | 1.93671  |
| C | -0.68363 | -3.0535  | 2.00483  |
| C | -3.17546 | -2.12777 | 2.75314  |
| C | -1.5     | -3.83882 | 2.8169   |
| H | 0.29276  | -3.43887 | 1.73535  |
| C | -2.7622  | -3.38833 | 3.20546  |
| H | -4.15096 | -1.73642 | 3.02644  |
| H | -1.14093 | -4.80901 | 3.15069  |
| S | -3.07363 | 0.31494  | 1.47972  |
| O | -2.90009 | 0.33372  | 0.00758  |
| O | -4.44188 | 0.30293  | 2.0343   |
| N | -2.0955  | 1.3926   | 2.11424  |
| H | -2.35096 | 1.55977  | 3.08763  |
| C | 0.65859  | 1.68982  | -0.01304 |
| C | 1.97705  | 1.6766   | -0.49575 |
| C | -0.18624 | 2.7639   | -0.34112 |
| C | 2.43878  | 2.70861  | -1.30732 |
| H | 2.64857  | 0.87169  | -0.21552 |
| C | 0.28768  | 3.79864  | -1.13701 |
| H | -1.20579 | 2.7593   | 0.02992  |
| C | 1.59939  | 3.78149  | -1.63483 |
| H | 3.45815  | 2.69298  | -1.6769  |
| H | -0.35672 | 4.63143  | -1.3991  |
| C | 2.04184  | 4.91164  | -2.49081 |
| O | 1.35234  | 5.86692  | -2.79227 |
| O | 3.32403  | 4.771    | -2.91626 |
| C | 3.80762  | 5.83431  | -3.74748 |

|   |          |          |          |
|---|----------|----------|----------|
| H | 4.83463  | 5.56593  | -3.99895 |
| H | 3.2012   | 5.92311  | -4.65308 |
| H | 3.7802   | 6.78703  | -3.21133 |
| H | -0.68591 | 1.00768  | 1.44374  |
| C | -3.66654 | -4.22145 | 4.07971  |
| H | -4.58539 | -4.49422 | 3.54629  |
| H | -3.17651 | -5.14532 | 4.40179  |
| H | -3.97051 | -3.66669 | 4.97507  |
| O | -1.06951 | -1.96135 | -5.34487 |
| O | 5.42293  | -3.35853 | 1.63524  |
| C | -2.36372 | -2.33484 | -5.80532 |
| H | -3.1112  | -1.57207 | -5.55603 |
| H | -2.27834 | -2.42001 | -6.88958 |
| H | -2.67401 | -3.30073 | -5.38738 |
| C | 6.26368  | -2.84038 | 2.66059  |
| H | 5.77449  | -2.88978 | 3.64125  |
| H | 7.15022  | -3.47584 | 2.66505  |
| H | 6.55823  | -1.80476 | 2.45045  |

### Int-3'

|   |          |          |          |
|---|----------|----------|----------|
| C | 2.01817  | 3.74685  | -1.81697 |
| C | 1.50034  | 5.02159  | -1.58609 |
| H | 1.6901   | 1.62717  | -1.65519 |
| C | 1.27525  | 2.61489  | -1.47301 |
| C | 0.23036  | 5.16006  | -1.02126 |
| C | -0.51994 | 4.03164  | -0.68962 |
| C | 0.0016   | 2.74759  | -0.9021  |
| H | -0.18252 | 6.14995  | -0.8453  |
| H | -1.51418 | 4.15027  | -0.26935 |
| C | -2.63446 | 1.49334  | 0.33392  |
| C | -3.82518 | 0.98012  | -0.20449 |
| C | -2.69414 | 2.19629  | 1.54687  |
| C | -5.03724 | 1.14928  | 0.46453  |
| H | -3.80191 | 0.4632   | -1.15574 |
| C | -3.91448 | 2.40141  | 2.19288  |
| H | -1.78631 | 2.58335  | 1.99765  |
| C | -5.08794 | 1.86773  | 1.66025  |
| H | -3.94164 | 2.96565  | 3.12135  |
| P | -1.00028 | 1.23611  | -0.53288 |
| N | -0.50883 | -0.24076 | -1.30638 |
| H | -5.94627 | 0.73005  | 0.04103  |
| H | -6.03558 | 2.01046  | 2.17304  |
| H | 3.00299  | 3.62889  | -2.26138 |

|   |          |          |          |
|---|----------|----------|----------|
| H | 2.08034  | 5.90232  | -1.84822 |
| C | -0.12305 | 0.78299  | 1.12326  |
| C | 0.88367  | 1.55125  | 1.72528  |
| C | -0.57705 | -0.35027 | 1.82268  |
| C | 1.42896  | 1.19323  | 2.96438  |
| C | -0.03598 | -0.71601 | 3.0528   |
| H | -1.36986 | -0.96225 | 1.39828  |
| C | 0.97502  | 0.05719  | 3.63003  |
| H | 2.20998  | 1.80838  | 3.40489  |
| H | -0.40291 | -1.60321 | 3.56283  |
| H | 1.3995   | -0.22342 | 4.59049  |
| H | 1.25855  | 2.44288  | 1.23396  |
| C | 0.34197  | -1.33074 | -1.03056 |
| C | -0.08566 | -2.609   | -1.43811 |
| C | 1.62421  | -1.20181 | -0.46884 |
| C | 0.73223  | -3.72092 | -1.28891 |
| H | -1.07637 | -2.7217  | -1.87254 |
| C | 2.43231  | -2.31916 | -0.30478 |
| H | 1.98377  | -0.22971 | -0.15668 |
| C | 2.00337  | -3.59012 | -0.71175 |
| H | 0.38487  | -4.69655 | -1.61017 |
| H | 3.42125  | -2.22112 | 0.131    |
| C | 2.92196  | -4.73863 | -0.51819 |
| O | 4.03217  | -4.66548 | -0.02546 |
| O | 2.38975  | -5.90825 | -0.95546 |
| C | 3.23078  | -7.05806 | -0.79348 |
| H | 3.46786  | -7.21757 | 0.26204  |
| H | 2.65782  | -7.898   | -1.18846 |
| H | 4.16446  | -6.93508 | -1.34927 |
| O | -1.9176  | 1.52784  | -2.04315 |
| H | -1.14264 | -0.41697 | -2.07659 |
| H | -1.30051 | 1.76066  | -2.75528 |

#### Int-4

|   |          |          |          |
|---|----------|----------|----------|
| C | -3.0231  | -0.85277 | -3.64129 |
| C | -2.25326 | -1.24955 | -4.74248 |
| H | -3.02606 | -0.38737 | -1.54936 |
| C | -2.4141  | -0.68454 | -2.39678 |
| C | -0.87611 | -1.46305 | -4.58203 |
| C | -0.27703 | -1.27519 | -3.34182 |
| C | -1.04027 | -0.88793 | -2.22873 |
| H | -0.29451 | -1.77192 | -5.445   |
| H | 0.79082  | -1.44351 | -3.24383 |



|   |          |          |          |
|---|----------|----------|----------|
| C | 1.38773  | -1.30562 | -0.2486  |
| C | 1.6415   | -2.14852 | 0.84321  |
| C | 2.4766   | -0.96294 | -1.07672 |
| C | 2.92013  | -2.63879 | 1.10847  |
| H | 0.84246  | -2.41972 | 1.5234   |
| C | 3.74357  | -1.47623 | -0.84881 |
| H | 2.32707  | -0.27082 | -1.89651 |
| C | 3.97937  | -2.31584 | 0.25143  |
| H | 4.57693  | -1.22128 | -1.49575 |
| P | -0.30469 | -0.63089 | -0.55084 |
| N | 0.35551  | 0.99546  | -1.16599 |
| H | 3.07383  | -3.26689 | 1.97822  |
| H | -4.08852 | -0.67826 | -3.73658 |
| C | -1.2148  | -2.20363 | 0.13305  |
| C | -2.01737 | -2.0703  | 1.25954  |
| C | -1.16993 | -3.47925 | -0.44845 |
| C | -2.76366 | -3.10811 | 1.82082  |
| C | -1.89431 | -4.53678 | 0.09482  |
| H | -0.56731 | -3.64777 | -1.33755 |
| C | -2.7062  | -4.37241 | 1.23284  |
| H | -3.38432 | -2.9299  | 2.69464  |
| H | -1.83885 | -5.51655 | -0.37517 |
| S | -1.98798 | -0.44369 | 1.96688  |
| O | -3.33781 | 0.11298  | 2.09914  |
| O | -1.09104 | -0.39244 | 3.1297   |
| N | -1.22312 | 0.26528  | 0.61419  |
| C | 1.03011  | 2.02582  | -0.53038 |
| C | 1.20352  | 3.2605   | -1.20353 |
| C | 1.56622  | 1.90938  | 0.77423  |
| C | 1.88035  | 4.31463  | -0.61421 |
| H | 0.79656  | 3.37458  | -2.20648 |
| C | 2.2419   | 2.97383  | 1.35607  |
| H | 1.46166  | 0.98508  | 1.33053  |
| C | 2.41432  | 4.18919  | 0.67979  |
| H | 1.99891  | 5.24799  | -1.1539  |
| H | 2.64958  | 2.87695  | 2.3573   |
| C | 3.14596  | 5.27842  | 1.36051  |
| O | 3.62994  | 5.2068   | 2.47581  |
| O | 3.23123  | 6.40343  | 0.59997  |
| C | 3.92833  | 7.49598  | 1.20992  |
| H | 4.96294  | 7.2201   | 1.4332   |
| H | 3.89833  | 8.30708  | 0.48079  |
| H | 3.4379   | 7.79807  | 2.13958  |
| H | -0.97809 | 1.2396   | 0.77311  |

|   |          |          |          |
|---|----------|----------|----------|
| H | -0.07119 | 1.28472  | -2.03884 |
| C | -3.50216 | -5.53017 | 1.78729  |
| H | -2.86384 | -6.40351 | 1.9663   |
| H | -3.98516 | -5.26678 | 2.73293  |
| H | -4.28771 | -5.8431  | 1.0879   |
| O | -2.74121 | -1.45292 | -5.99671 |
| O | 5.25656  | -2.7512  | 0.4001   |
| C | -4.12983 | -1.25387 | -6.22272 |
| H | -4.42675 | -0.21754 | -6.01616 |
| H | -4.29362 | -1.47257 | -7.27914 |
| H | -4.7383  | -1.93348 | -5.61225 |
| C | 5.5679   | -3.57251 | 1.51861  |
| H | 6.63474  | -3.78752 | 1.44106  |
| H | 5.36857  | -3.05338 | 2.46436  |
| H | 5.00405  | -4.5137  | 1.49423  |

#### Int-4'

|   |          |         |          |
|---|----------|---------|----------|
| C | 0.87302  | 4.53244 | -1.16919 |
| C | 0.06154  | 4.975   | -2.21371 |
| H | 1.24495  | 2.98583 | 0.27521  |
| C | 0.601    | 3.31853 | -0.53266 |
| C | -1.03556 | 4.20752 | -2.61108 |
| C | -1.32554 | 3.00906 | -1.96009 |
| C | -0.50418 | 2.54949 | -0.92062 |
| H | -1.67367 | 4.5464  | -3.42266 |
| H | -2.19748 | 2.43219 | -2.25533 |
| C | -2.61687 | 1.58954 | 0.50028  |
| C | -2.5973  | 2.72718 | 1.32675  |
| C | -3.86755 | 1.03275 | 0.1922   |
| C | -3.77136 | 3.28716 | 1.82654  |
| H | -1.64823 | 3.18991 | 1.58876  |
| C | -5.0498  | 1.59231 | 0.68976  |
| H | -3.92098 | 0.15478 | -0.44017 |
| C | -5.0075  | 2.71963 | 1.50757  |
| H | -6.00516 | 1.1403  | 0.4338   |
| P | -0.93359 | 0.91948 | -0.13983 |
| N | 0.66757  | 0.26508 | -0.97756 |
| H | -3.7221  | 4.16688 | 2.46351  |
| H | -5.9263  | 3.15379 | 1.8935   |
| H | 1.72343  | 5.12785 | -0.84776 |
| H | 0.2797   | 5.91481 | -2.71347 |
| C | -0.26924 | 0.51776 | 1.54719  |
| C | 1.08916  | 0.65934 | 1.87227  |

|   |          |          |          |
|---|----------|----------|----------|
| C | -1.14404 | 0.01967  | 2.5266   |
| C | 1.55174  | 0.35031  | 3.15118  |
| C | -0.67238 | -0.3291  | 3.79205  |
| H | -2.19776 | -0.0997  | 2.3011   |
| C | 0.67366  | -0.15054 | 4.11292  |
| H | 2.604    | 0.48253  | 3.38747  |
| H | -1.36209 | -0.73132 | 4.529    |
| H | 1.03806  | -0.40783 | 5.1039   |
| H | 1.79184  | 0.98579  | 1.11549  |
| C | 1.28941  | -0.96837 | -0.98733 |
| C | 0.76224  | -2.09983 | -0.31701 |
| C | 2.50317  | -1.14117 | -1.70177 |
| C | 1.41668  | -3.3236  | -0.36339 |
| H | -0.15746 | -2.01506 | 0.25115  |
| C | 3.14475  | -2.36521 | -1.74348 |
| H | 2.93017  | -0.28841 | -2.22636 |
| C | 2.61518  | -3.48249 | -1.07479 |
| H | 0.99316  | -4.17378 | 0.16062  |
| H | 4.07224  | -2.48364 | -2.29507 |
| C | 3.34639  | -4.76222 | -1.15421 |
| O | 4.39003  | -4.93677 | -1.75903 |
| O | 2.72848  | -5.76176 | -0.46699 |
| C | 3.39561  | -7.02801 | -0.50798 |
| H | 2.7771   | -7.70509 | 0.08327  |
| H | 3.48188  | -7.38887 | -1.53693 |
| H | 4.39874  | -6.95283 | -0.07843 |
| O | -1.75622 | -0.23405 | -0.99601 |
| H | -1.11896 | -0.71139 | -1.55538 |
| H | 1.14189  | 0.95221  | -1.5515  |

#### TS-4

|   |          |          |          |
|---|----------|----------|----------|
| C | -2.18884 | 0.20775  | -3.79405 |
| C | -1.33454 | -0.2354  | -4.81288 |
| H | -2.43705 | 0.52141  | -1.68925 |
| C | -1.75739 | 0.1881   | -2.46821 |
| C | -0.05141 | -0.704   | -4.48676 |
| C | 0.37361  | -0.72134 | -3.16636 |
| C | -0.47207 | -0.26392 | -2.13944 |
| H | 0.59485  | -1.04748 | -5.28815 |
| H | 1.37049  | -1.08601 | -2.93948 |
| C | 1.78063  | -0.39955 | -0.11604 |
| C | 2.28408  | -1.12279 | 0.9753   |
| C | 2.68367  | 0.30709  | -0.93469 |

|   |          |          |          |
|---|----------|----------|----------|
| C | 3.65093  | -1.16154 | 1.24292  |
| H | 1.6098   | -1.66046 | 1.63428  |
| C | 4.04451  | 0.25003  | -0.69317 |
| H | 2.31148  | 0.9189   | -1.74703 |
| C | 4.54101  | -0.47873 | 0.40163  |
| H | 4.74688  | 0.79323  | -1.31635 |
| P | 0.00012  | -0.33692 | -0.392   |
| N | 0.15548  | 2.20254  | -0.63775 |
| H | 4.00723  | -1.71952 | 2.10072  |
| H | -3.18711 | 0.56592  | -4.0163  |
| C | -0.60943 | -2.00242 | 0.14251  |
| C | -1.71947 | -1.97012 | 0.98581  |
| C | -0.12014 | -3.25181 | -0.25235 |
| C | -2.34218 | -3.12269 | 1.45497  |
| C | -0.73555 | -4.41469 | 0.20668  |
| H | 0.74183  | -3.32032 | -0.91025 |
| C | -1.84744 | -4.37275 | 1.06598  |
| H | -3.19912 | -3.05022 | 2.11884  |
| H | -0.3459  | -5.38036 | -0.1064  |
| S | -2.31027 | -0.32316 | 1.39319  |
| O | -3.54181 | -0.03681 | 0.64407  |
| O | -2.30724 | -0.12061 | 2.84179  |
| N | -1.00411 | 0.47761  | 0.67935  |
| C | 1.17206  | 3.04567  | -0.27559 |
| C | 1.72326  | 4.01698  | -1.15716 |
| C | 1.73841  | 2.97168  | 1.02804  |
| C | 2.75857  | 4.85054  | -0.76715 |
| H | 1.30797  | 4.10589  | -2.1601  |
| C | 2.77666  | 3.80049  | 1.40784  |
| H | 1.33092  | 2.25162  | 1.73237  |
| C | 3.31261  | 4.75564  | 0.52221  |
| H | 3.15268  | 5.58435  | -1.46285 |
| H | 3.19789  | 3.73406  | 2.4065   |
| C | 4.42062  | 5.60303  | 0.98882  |
| O | 4.94561  | 5.54111  | 2.08891  |
| O | 4.83119  | 6.50162  | 0.04526  |
| C | 5.90468  | 7.35377  | 0.45112  |
| H | 6.79528  | 6.76951  | 0.70197  |
| H | 6.10448  | 8.00354  | -0.40297 |
| H | 5.62267  | 7.94901  | 1.32477  |
| H | -0.88745 | 1.52652  | 0.39524  |
| H | -0.17396 | 2.42472  | -1.57751 |
| C | -2.4769  | -5.64781 | 1.5734   |
| H | -1.88717 | -6.07672 | 2.39386  |

|   |          |          |          |
|---|----------|----------|----------|
| H | -3.48822 | -5.47222 | 1.95162  |
| H | -2.53407 | -6.40523 | 0.78426  |
| O | 5.88531  | -0.45575 | 0.55923  |
| O | -1.65019 | -0.2559  | -6.1332  |
| C | -2.93164 | 0.21549  | -6.53327 |
| H | -3.07387 | 1.26857  | -6.26027 |
| H | -2.9579  | 0.1159   | -7.61934 |
| H | -3.73594 | -0.38696 | -6.09274 |
| C | 6.45312  | -1.09806 | 1.69536  |
| H | 7.52659  | -0.91539 | 1.63207  |
| H | 6.06476  | -0.67223 | 2.62839  |
| H | 6.26618  | -2.17932 | 1.67921  |

#### TS-4'

|   |          |          |          |
|---|----------|----------|----------|
| C | 1.29408  | 3.84357  | -1.72891 |
| C | 0.41667  | 4.78765  | -2.2645  |
| H | 1.49938  | 1.92949  | -0.79047 |
| C | 0.80049  | 2.67466  | -1.14959 |
| C | -0.95876 | 4.56265  | -2.20666 |
| C | -1.4565  | 3.41281  | -1.59345 |
| C | -0.58274 | 2.45255  | -1.05821 |
| H | -1.65019 | 5.28594  | -2.62976 |
| H | -2.52905 | 3.26457  | -1.53004 |
| C | -2.73596 | 1.8144   | 0.60134  |
| C | -2.41489 | 2.72743  | 1.61993  |
| C | -4.08938 | 1.59575  | 0.30677  |
| C | -3.4114  | 3.40418  | 2.32013  |
| H | -1.37374 | 2.91238  | 1.87501  |
| C | -5.0911  | 2.27276  | 1.01006  |
| H | -4.35884 | 0.89332  | -0.47343 |
| C | -4.75638 | 3.17775  | 2.01591  |
| H | -6.13465 | 2.08829  | 0.7677   |
| P | -1.33762 | 0.94089  | -0.30711 |
| N | 0.0522   | -0.17959 | -1.59795 |
| H | -3.13963 | 4.10592  | 3.1044   |
| H | -5.53579 | 3.70289  | 2.56183  |
| H | 2.36726  | 4.00675  | -1.77374 |
| H | 0.80377  | 5.69056  | -2.72868 |
| C | -0.57288 | 0.17984  | 1.1784   |
| C | 0.77146  | 0.31892  | 1.54169  |
| C | -1.42052 | -0.60125 | 1.98039  |
| C | 1.25529  | -0.2967  | 2.69643  |
| C | -0.92619 | -1.23992 | 3.11628  |

|   |          |          |          |
|---|----------|----------|----------|
| H | -2.46867 | -0.70838 | 1.71816  |
| C | 0.41187  | -1.08254 | 3.48129  |
| H | 2.29935  | -0.17394 | 2.96982  |
| H | -1.59035 | -1.85218 | 3.71996  |
| H | 0.79588  | -1.57266 | 4.37165  |
| H | 1.45317  | 0.89799  | 0.93234  |
| C | 0.94305  | -1.20798 | -1.3605  |
| C | 0.58119  | -2.33643 | -0.5825  |
| C | 2.25169  | -1.19811 | -1.91061 |
| C | 1.47334  | -3.37218 | -0.35839 |
| H | -0.41983 | -2.39046 | -0.1665  |
| C | 3.1356   | -2.24127 | -1.69309 |
| H | 2.55693  | -0.35106 | -2.52308 |
| C | 2.76821  | -3.34583 | -0.90674 |
| H | 1.16758  | -4.2241  | 0.23974  |
| H | 4.13244  | -2.22137 | -2.12306 |
| C | 3.75455  | -4.42229 | -0.70264 |
| O | 4.88612  | -4.43689 | -1.15711 |
| O | 3.27208  | -5.43737 | 0.06924  |
| C | 4.18771  | -6.51357 | 0.29386  |
| H | 3.65021  | -7.23272 | 0.91431  |
| H | 4.48732  | -6.97406 | -0.6521  |
| H | 5.08575  | -6.16035 | 0.80929  |
| O | -2.34794 | 0.03772  | -1.2078  |
| H | -1.66891 | -0.44308 | -1.77078 |
| H | 0.44273  | 0.46939  | -2.27731 |

# Product

|   |          |          |          |
|---|----------|----------|----------|
| C | -1.98758 | 0.38623  | -3.83128 |
| C | -1.19009 | -0.15839 | -4.84648 |
| H | -2.23267 | 0.64371  | -1.70825 |
| C | -1.61124 | 0.23028  | -2.4975  |
| C | -0.0155  | -0.8571  | -4.51491 |
| C | 0.35172  | -1.00808 | -3.18706 |
| C | -0.44164 | -0.46305 | -2.15938 |
| H | 0.58757  | -1.26757 | -5.31852 |
| H | 1.26664  | -1.54421 | -2.94972 |
| C | 1.70718  | -0.58274 | -0.17844 |
| C | 2.33753  | -1.30126 | 0.8465   |
| C | 2.47607  | 0.31378  | -0.94479 |
| C | 3.69958  | -1.15158 | 1.09956  |
| H | 1.76262  | -1.98585 | 1.46282  |
| C | 3.83109  | 0.47236  | -0.70017 |

|   |          |          |          |
|---|----------|----------|----------|
| H | 2.00961  | 0.89229  | -1.73603 |
| C | 4.45418  | -0.2594  | 0.32433  |
| H | 4.43207  | 1.16204  | -1.28397 |
| P | -0.08449 | -0.69859 | -0.39719 |
| H | 4.15709  | -1.72424 | 1.89774  |
| H | -2.89591 | 0.92944  | -4.06343 |
| C | -0.6808  | -2.33687 | 0.14817  |
| C | -1.73816 | -2.16417 | 1.04029  |
| C | -0.27815 | -3.62704 | -0.20439 |
| C | -2.40288 | -3.24856 | 1.59838  |
| C | -0.93932 | -4.71879 | 0.35799  |
| H | 0.53927  | -3.78692 | -0.90261 |
| C | -2.00096 | -4.54926 | 1.26373  |
| H | -3.22317 | -3.08554 | 2.29229  |
| H | -0.62866 | -5.72553 | 0.0895   |
| S | -2.17193 | -0.41743 | 1.33962  |
| O | -3.45745 | -0.17415 | 0.6602   |
| O | -2.10871 | -0.16236 | 2.78329  |
| N | -0.92866 | 0.29746  | 0.54809  |
| C | -2.68171 | -5.74521 | 1.88608  |
| H | -2.21418 | -6.0072  | 2.84439  |
| H | -3.73883 | -5.54293 | 2.08548  |
| H | -2.61777 | -6.62589 | 1.23897  |
| O | 5.78245  | -0.03326 | 0.48274  |
| O | -1.45985 | -0.06666 | -6.174   |
| C | -2.6375  | 0.61946  | -6.58248 |
| H | -2.6165  | 1.67142  | -6.27155 |
| H | -2.64977 | 0.56368  | -7.67203 |
| H | -3.53931 | 0.13966  | -6.18237 |
| C | 6.47033  | -0.71226 | 1.52661  |
| H | 7.5029   | -0.36387 | 1.47616  |
| H | 6.04964  | -0.46532 | 2.50919  |
| H | 6.4459   | -1.79976 | 1.38184  |

### Ph<sub>3</sub>PO

|   |          |          |          |
|---|----------|----------|----------|
| P | 0.002    | 0.0029   | 0.91568  |
| C | -1.18149 | -1.20814 | 0.21609  |
| C | -1.49804 | -2.31501 | 1.01763  |
| C | -1.77446 | -1.08191 | -1.04842 |
| C | -2.37935 | -3.29049 | 0.55161  |
| H | -1.06184 | -2.39055 | 2.00928  |
| C | -2.65408 | -2.06121 | -1.51282 |
| H | -1.56745 | -0.21175 | -1.66541 |

|   |          |          |          |
|---|----------|----------|----------|
| C | -2.95431 | -3.16716 | -0.71511 |
| H | -2.62174 | -4.14387 | 1.17929  |
| H | -3.11197 | -1.95516 | -2.49275 |
| H | -3.64266 | -3.92661 | -1.07659 |
| C | -0.45666 | 1.63259  | 0.21591  |
| C | -0.04162 | 2.08826  | -1.04368 |
| C | -1.26851 | 2.45408  | 1.0123   |
| C | -0.45218 | 3.33887  | -1.50844 |
| H | 0.61706  | 1.47871  | -1.65623 |
| C | -1.67482 | 3.70414  | 0.54595  |
| H | -1.55964 | 2.11048  | 2.00053  |
| C | -1.27118 | 4.14561  | -0.71603 |
| H | -0.12438 | 3.68663  | -2.48454 |
| H | -2.30151 | 4.33606  | 1.16957  |
| H | -1.58631 | 5.12077  | -1.078   |
| C | 1.64144  | -0.41782 | 0.21475  |
| C | 2.75967  | -0.13781 | 1.01415  |
| C | 1.82587  | -0.99973 | -1.04771 |
| C | 4.04391  | -0.41867 | 0.54803  |
| H | 2.60905  | 0.2816   | 2.0045   |
| C | 3.11261  | -1.27708 | -1.5123  |
| H | 0.96695  | -1.2557  | -1.66196 |
| C | 4.22189  | -0.98389 | -0.71662 |
| H | 4.9054   | -0.20189 | 1.174    |
| H | 3.24769  | -1.73104 | -2.49047 |
| H | 5.22286  | -1.20456 | -1.07801 |
| O | 0.00311  | 0.00255  | 2.4192   |

N<sub>2</sub>

|   |         |          |         |
|---|---------|----------|---------|
| N | 1.85312 | -1.98749 | 7.03701 |
| N | 1.19754 | -2.09222 | 6.15306 |

#### 4-CO<sub>2</sub>Me-PhNH<sub>2</sub>

|   |          |          |         |
|---|----------|----------|---------|
| C | 0.24976  | 0.06222  | 1.72716 |
| C | 1.1781   | 0.39425  | 2.72632 |
| C | -0.60066 | -1.03466 | 1.93564 |
| C | 1.25335  | -0.34534 | 3.89794 |
| H | 1.84007  | 1.24053  | 2.57942 |
| C | -0.53117 | -1.77878 | 3.10289 |
| H | -1.31831 | -1.28725 | 1.1617  |
| C | 0.39968  | -1.44601 | 4.10692 |
| H | 1.97945  | -0.07955 | 4.66294 |



|   |          |          |          |
|---|----------|----------|----------|
| H | -1.19387 | -2.62885 | 3.24858  |
| C | 0.1227   | 0.81825  | 0.46153  |
| O | -0.67423 | 0.56675  | -0.42419 |
| O | 1.00481  | 1.84876  | 0.37973  |
| C | 0.9289   | 2.61939  | -0.8262  |
| H | -0.05979 | 3.07451  | -0.93327 |
| H | 1.69588  | 3.38928  | -0.73093 |
| H | 1.12269  | 1.99098  | -1.69995 |
| N | 0.50951  | -2.21944 | 5.25436  |
| H | -0.30381 | -2.76779 | 5.50161  |
| H | 0.935    | -1.77161 | 6.05539  |

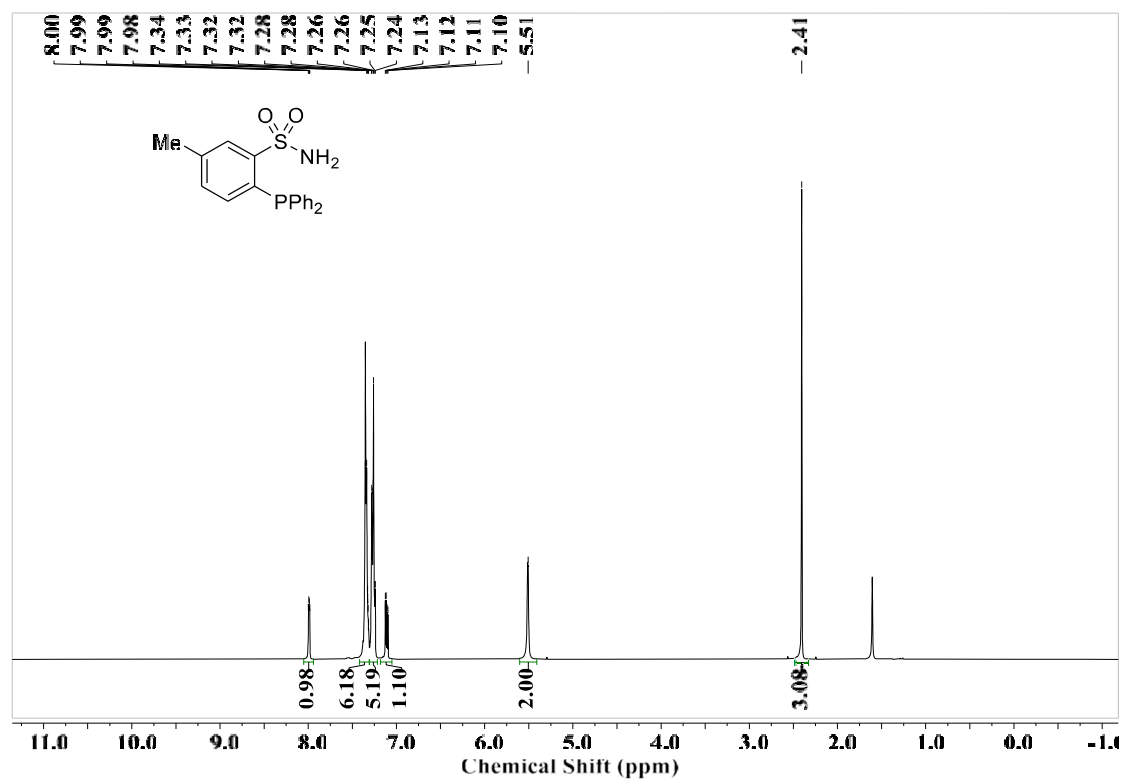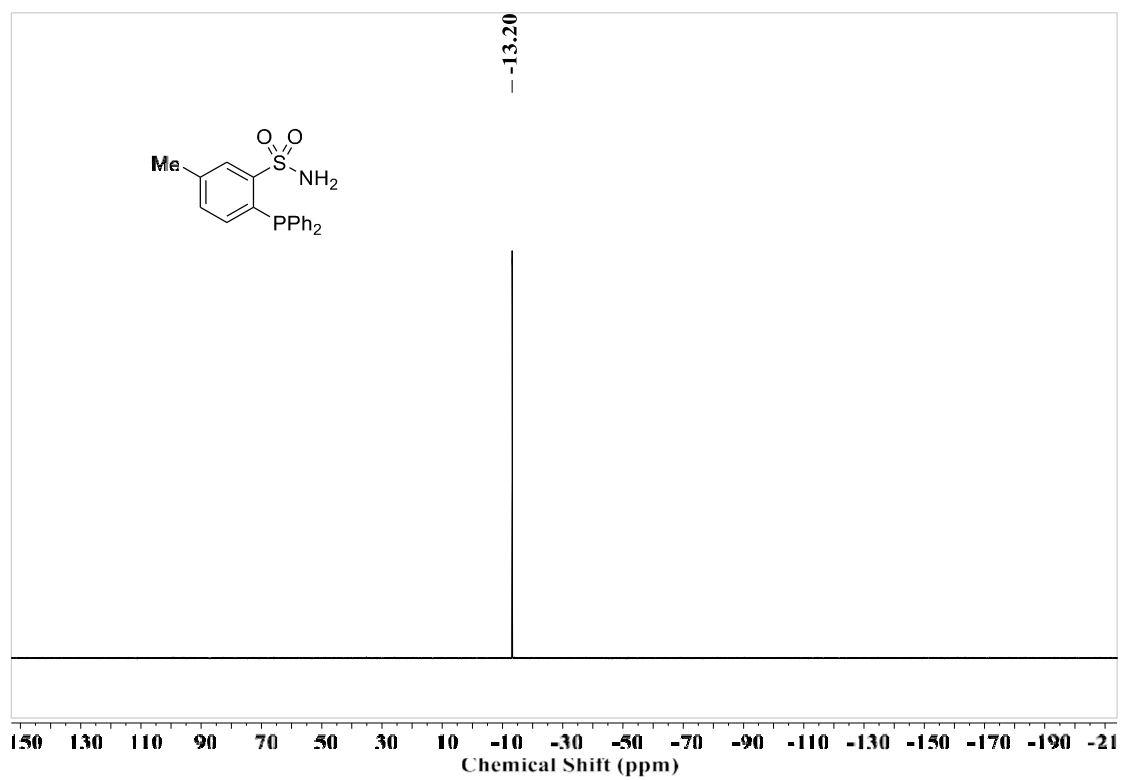

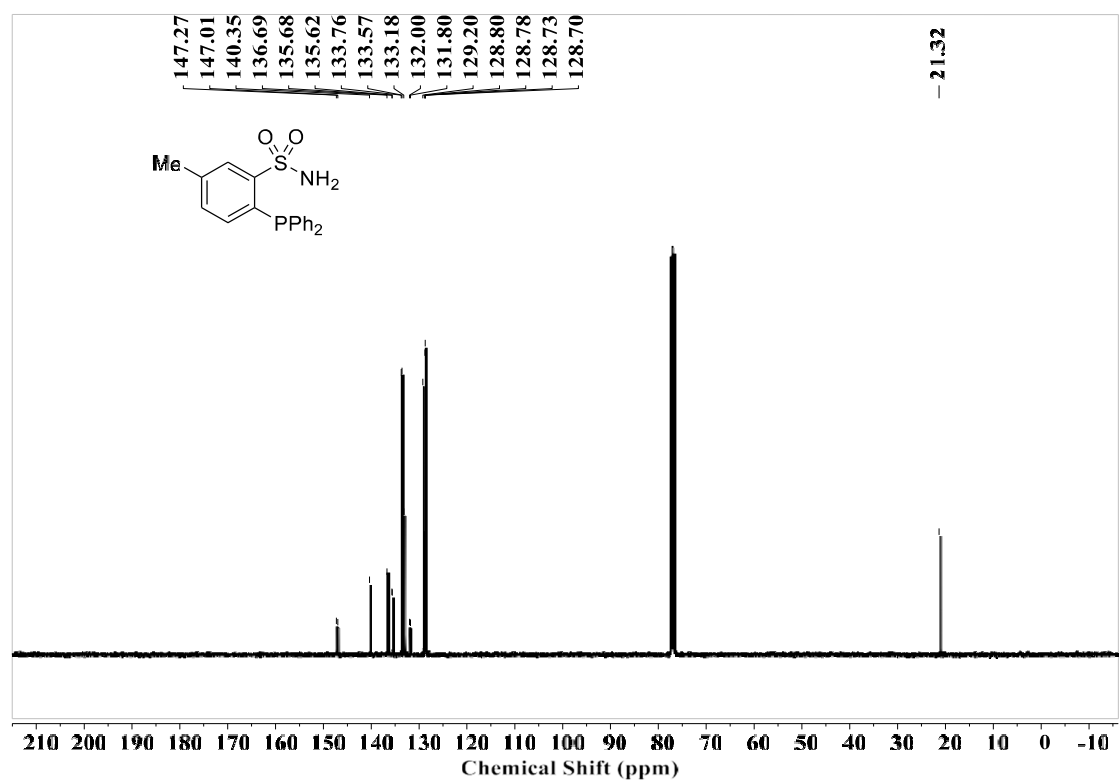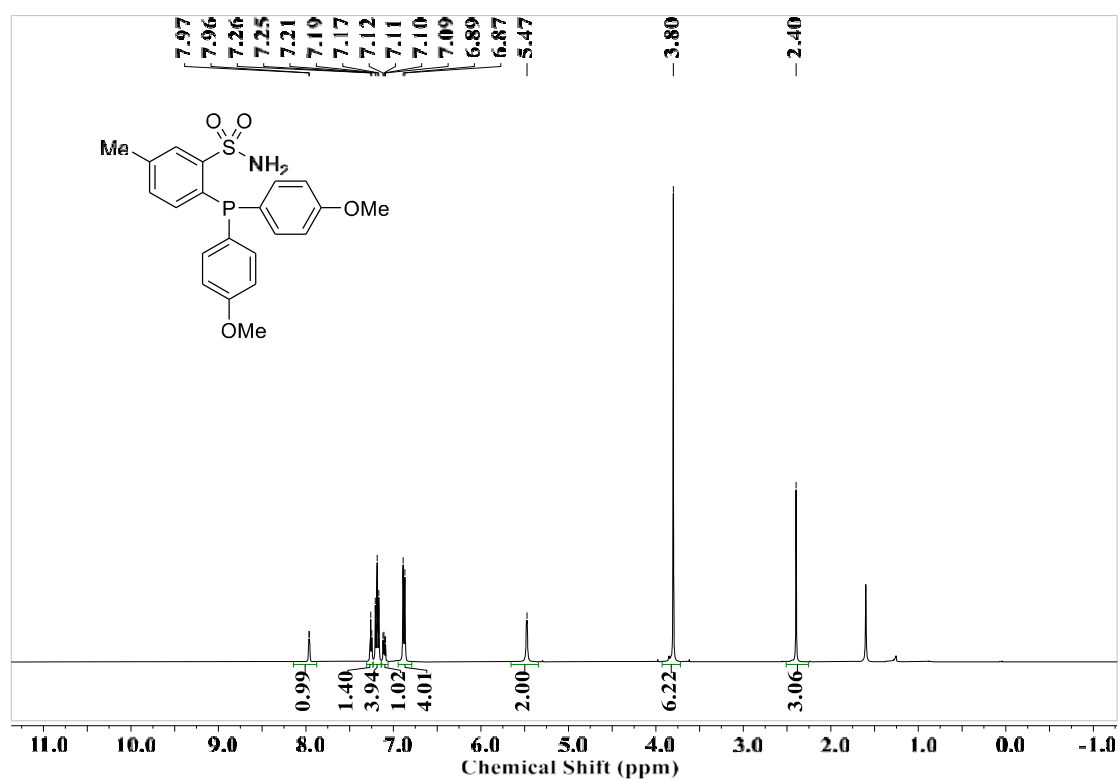

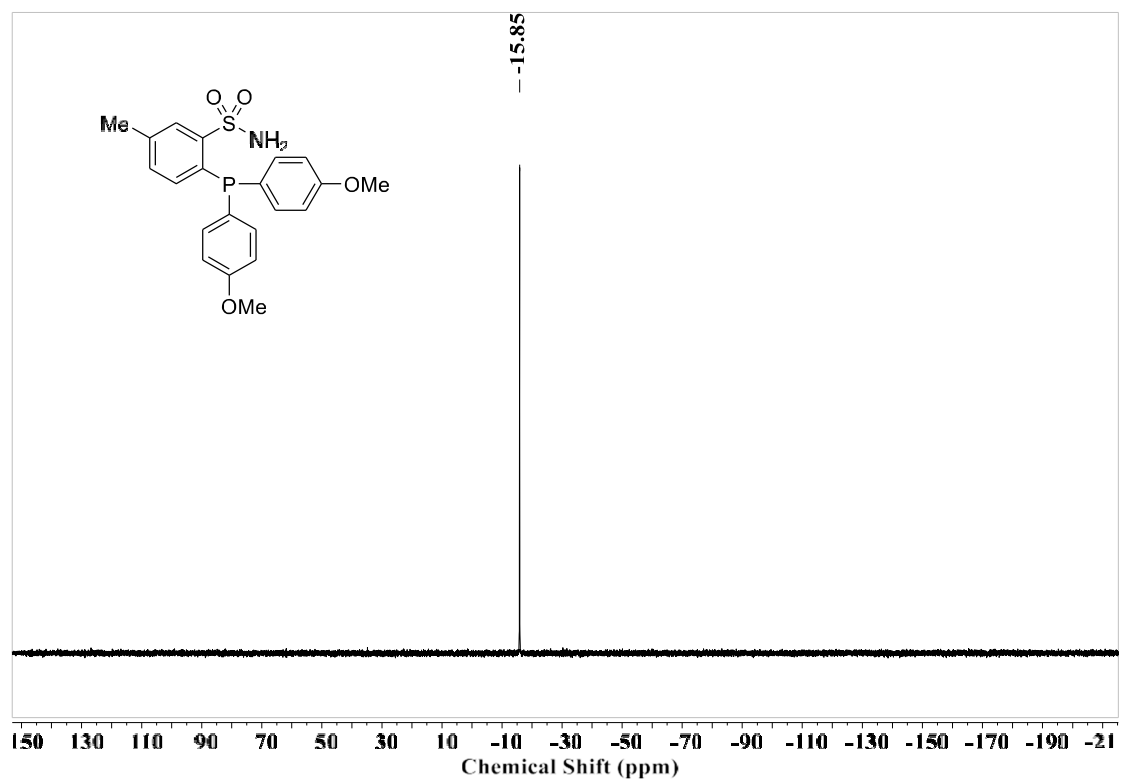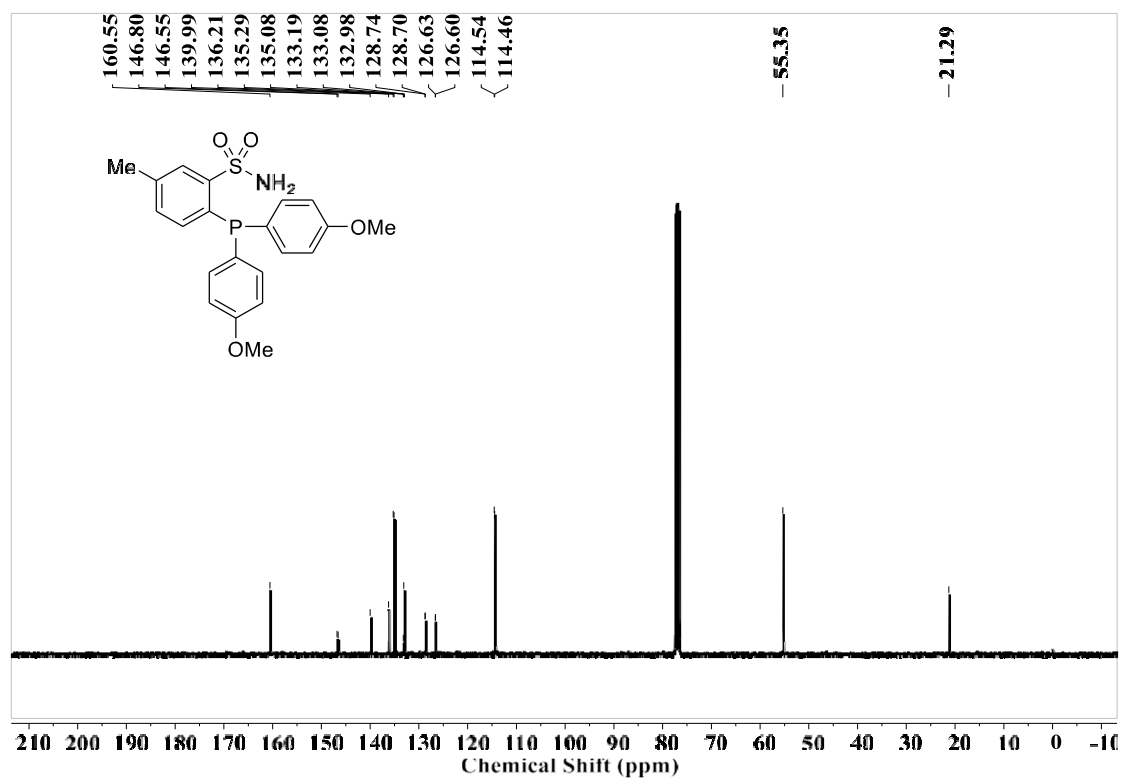

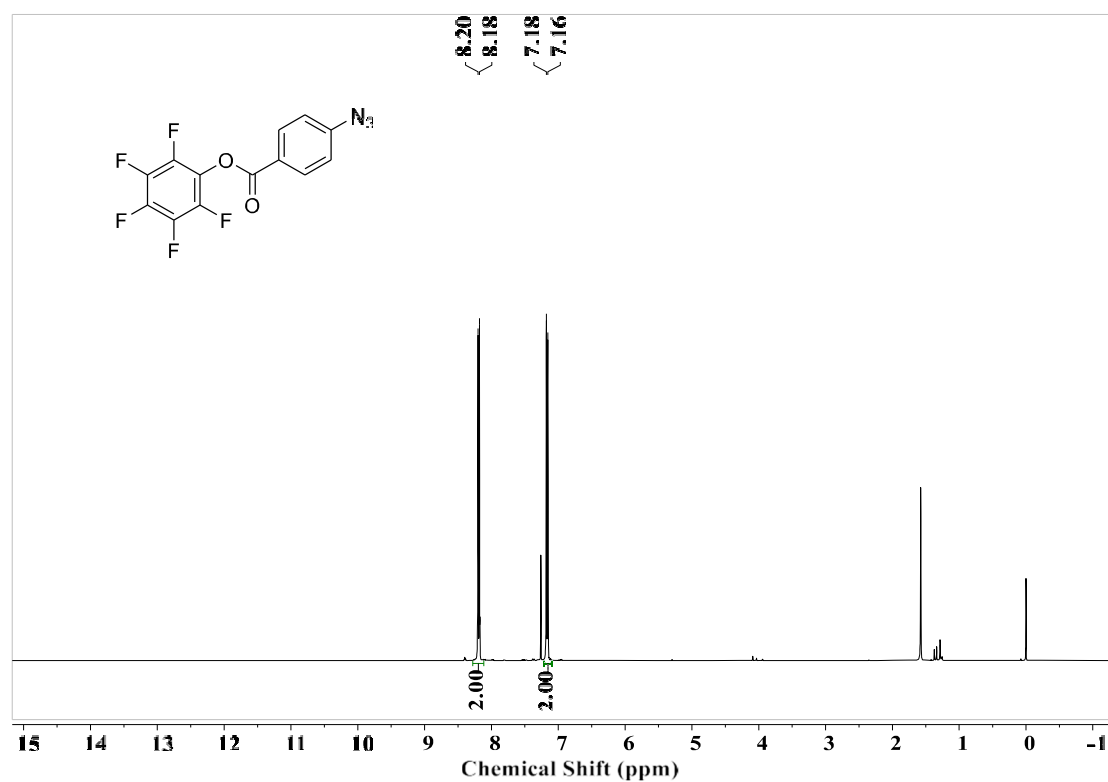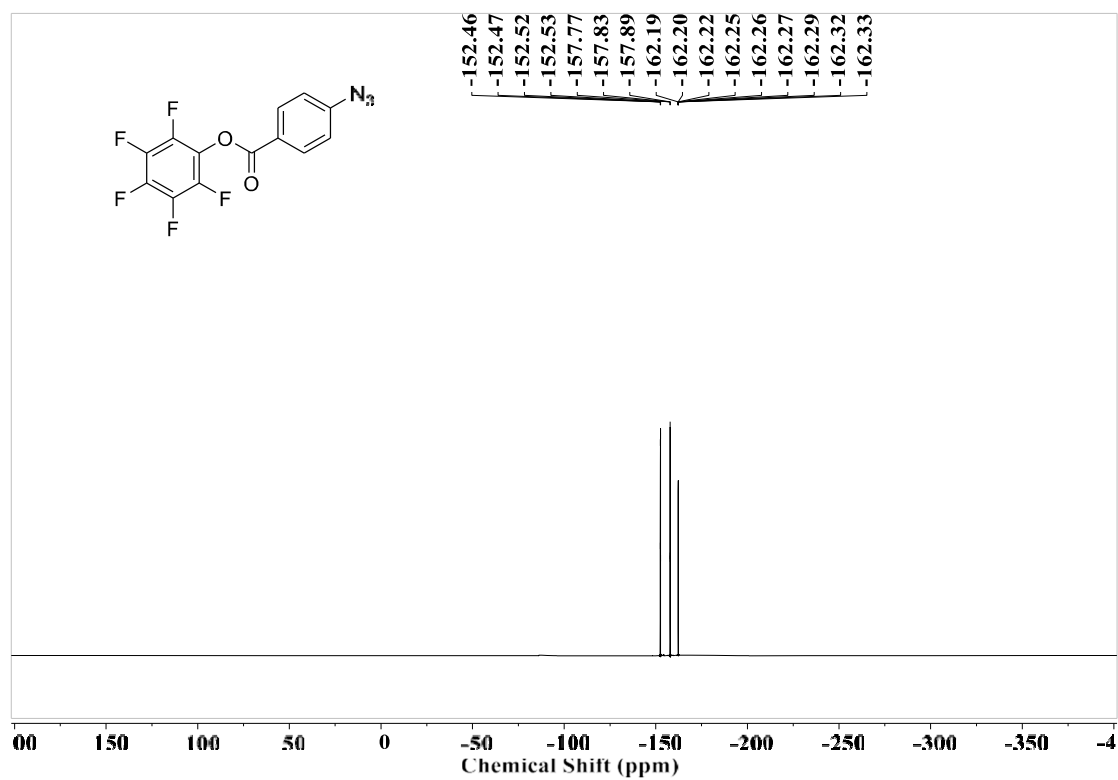

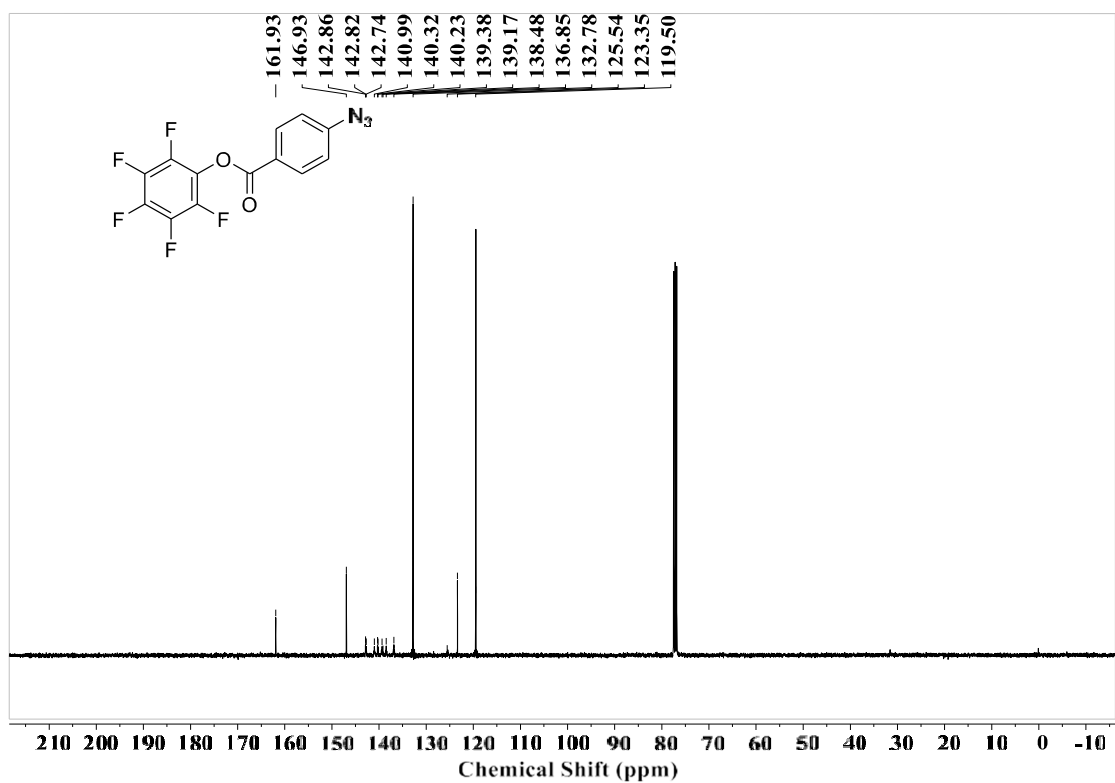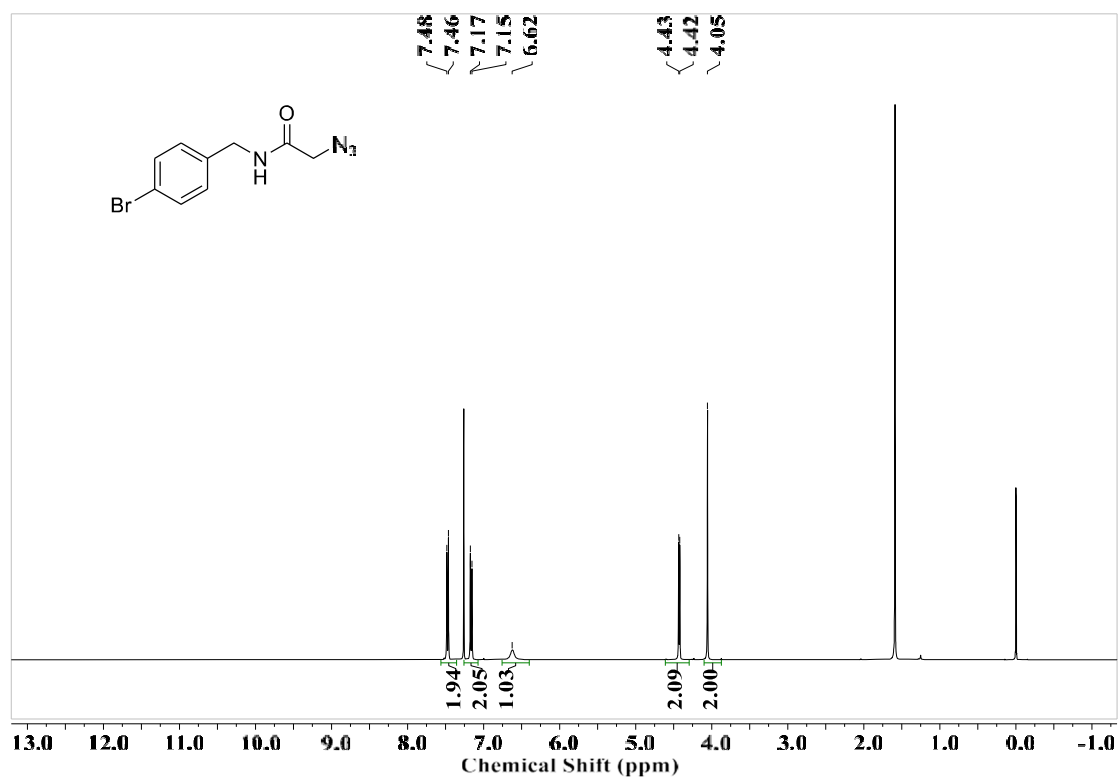

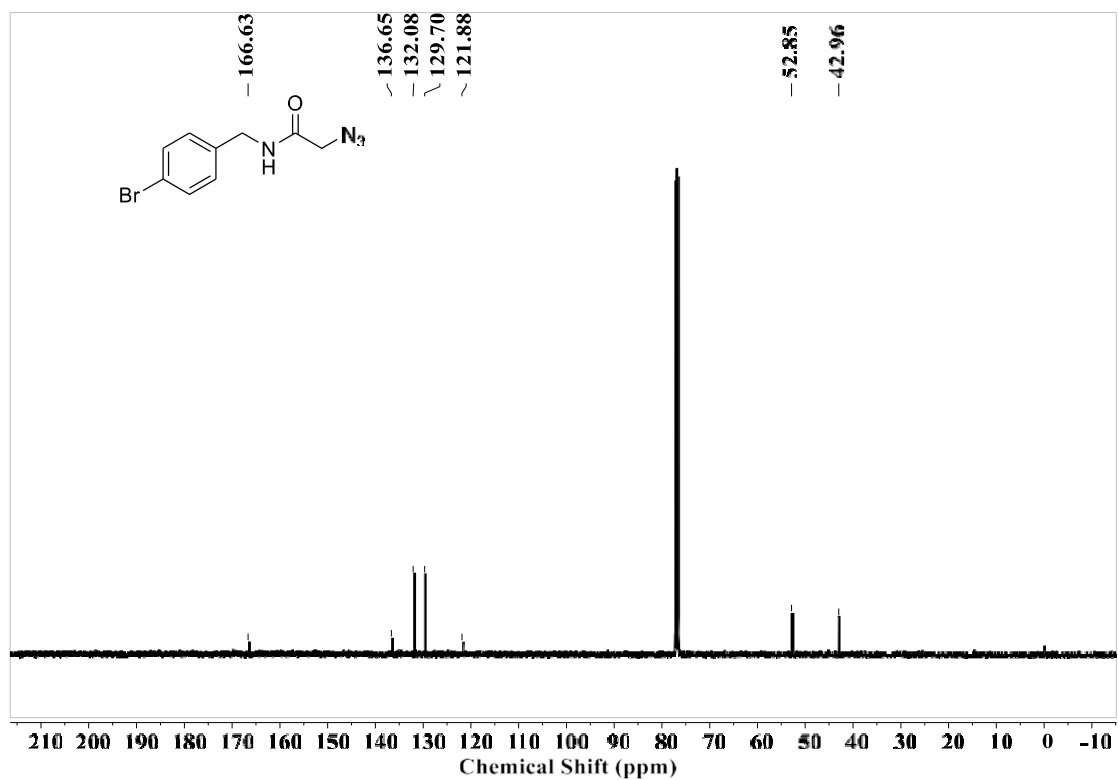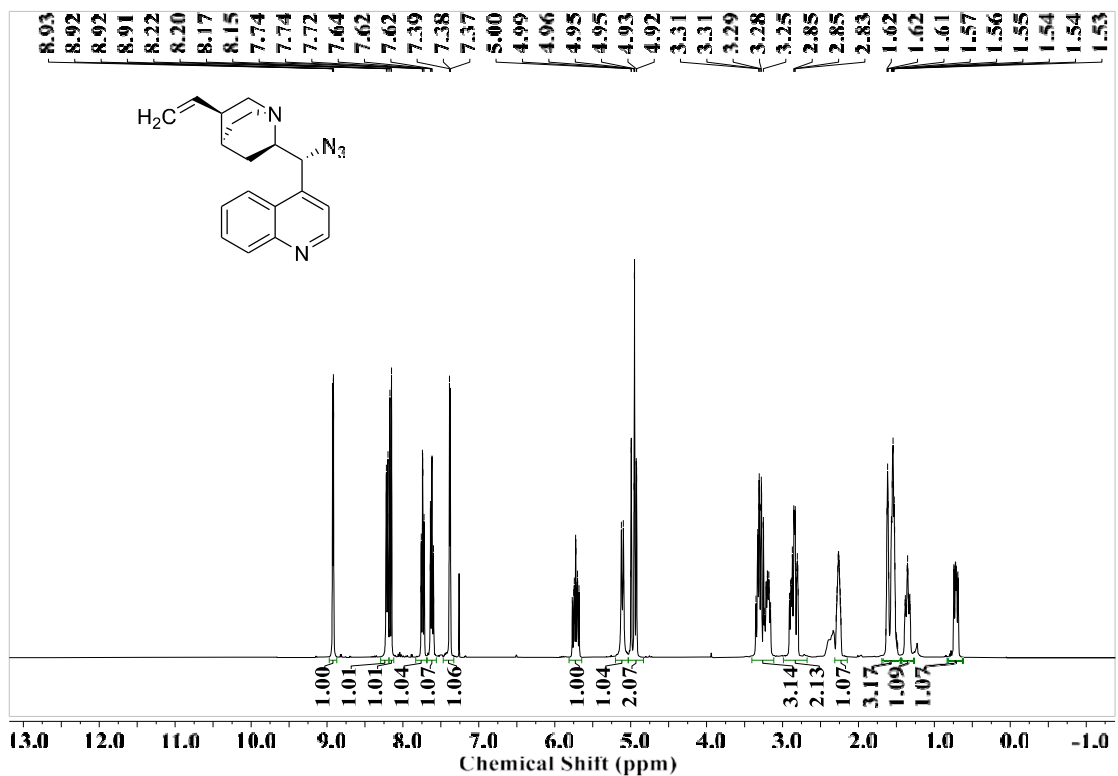

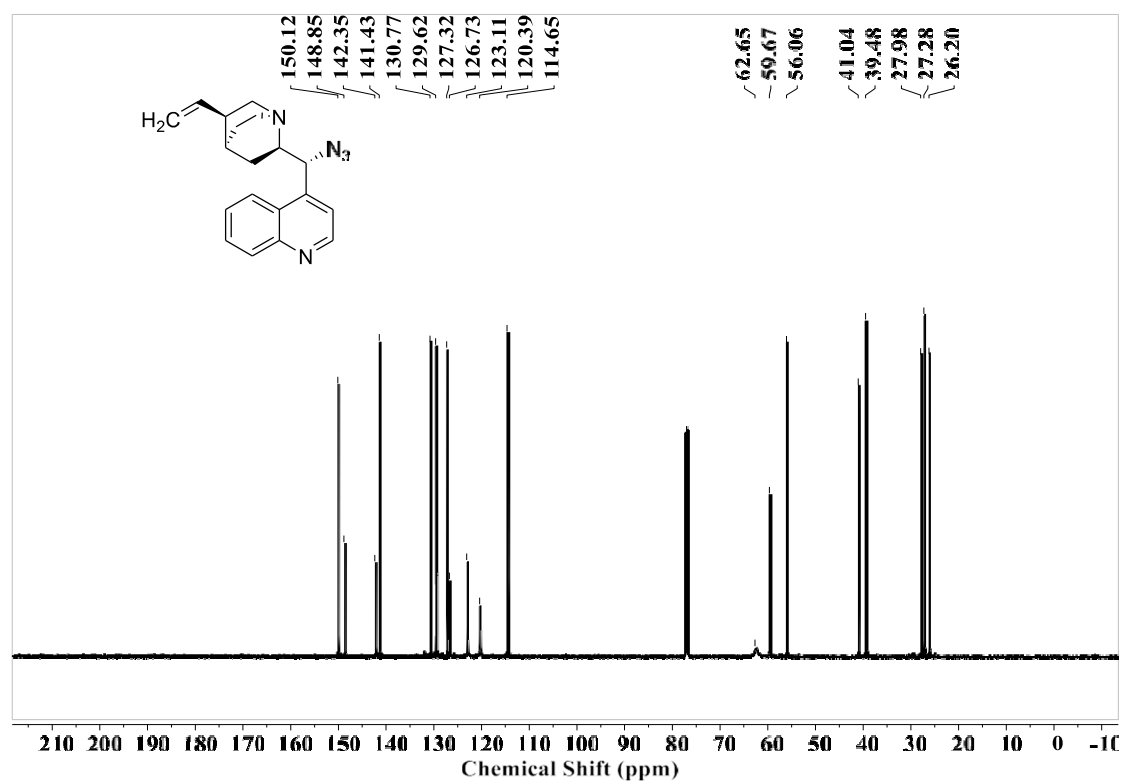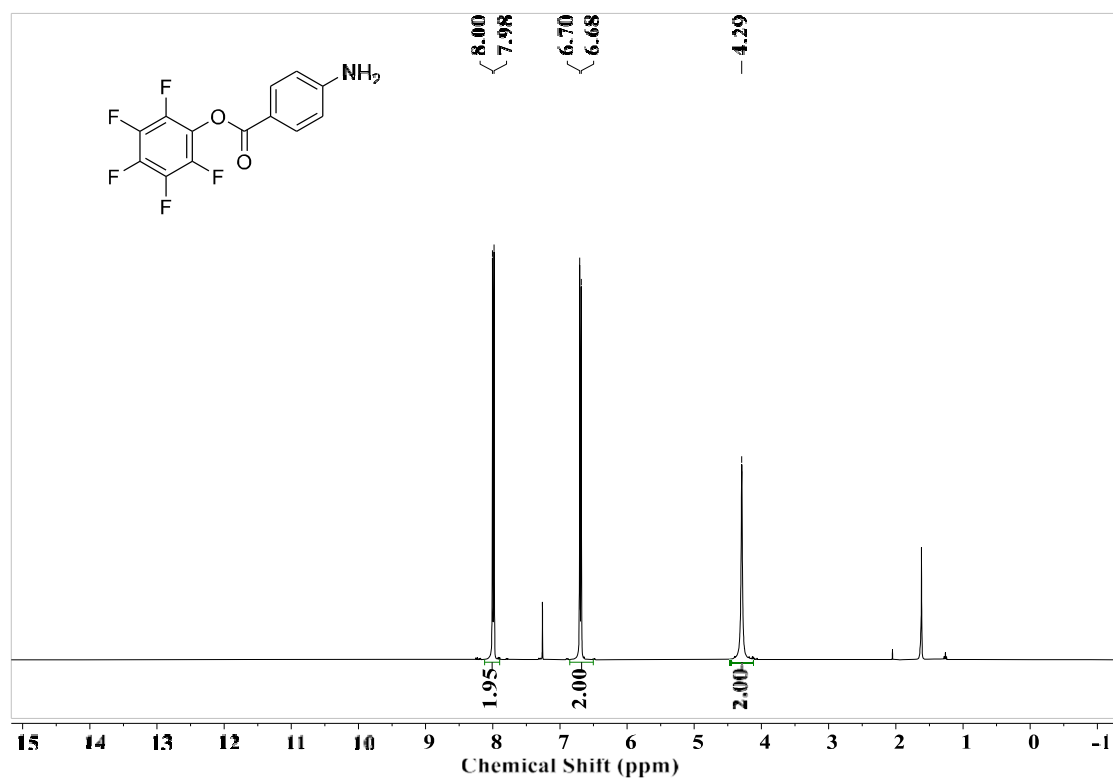



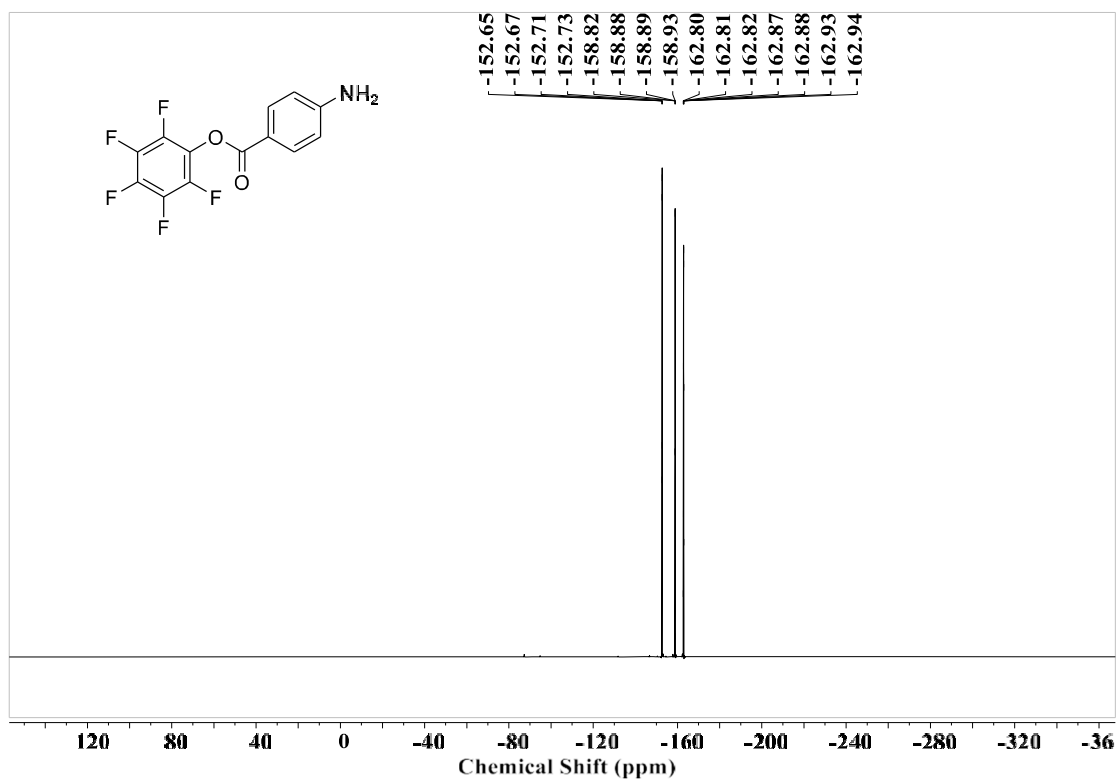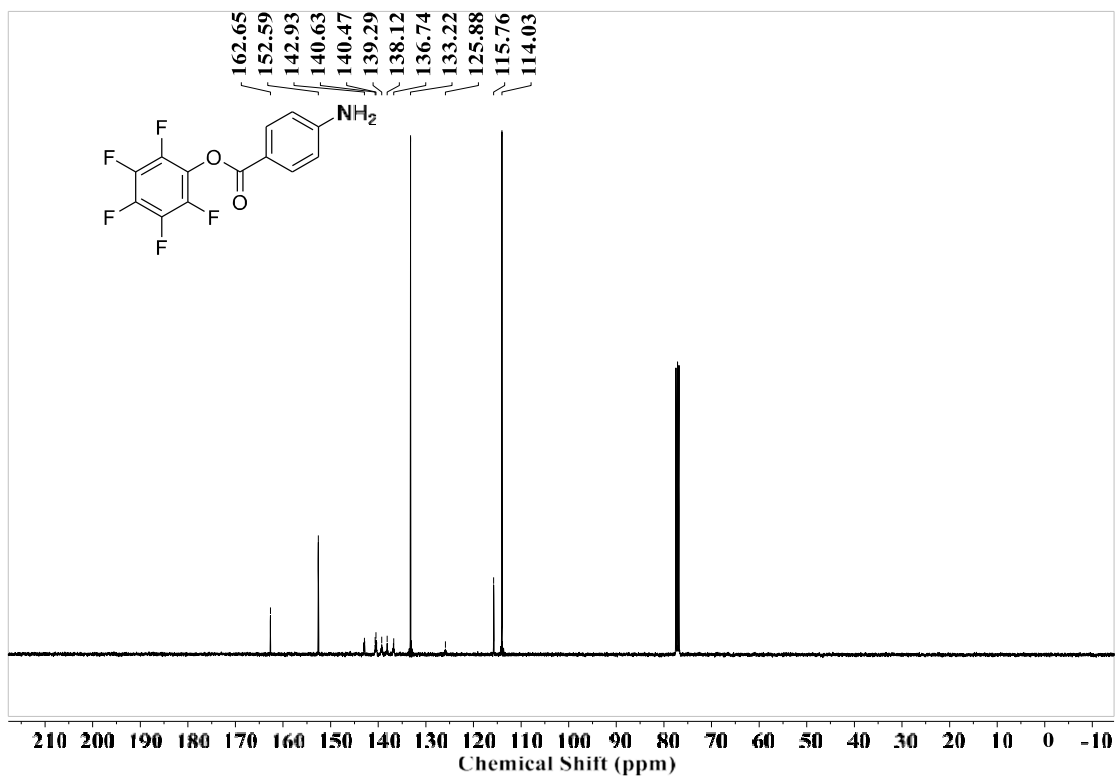

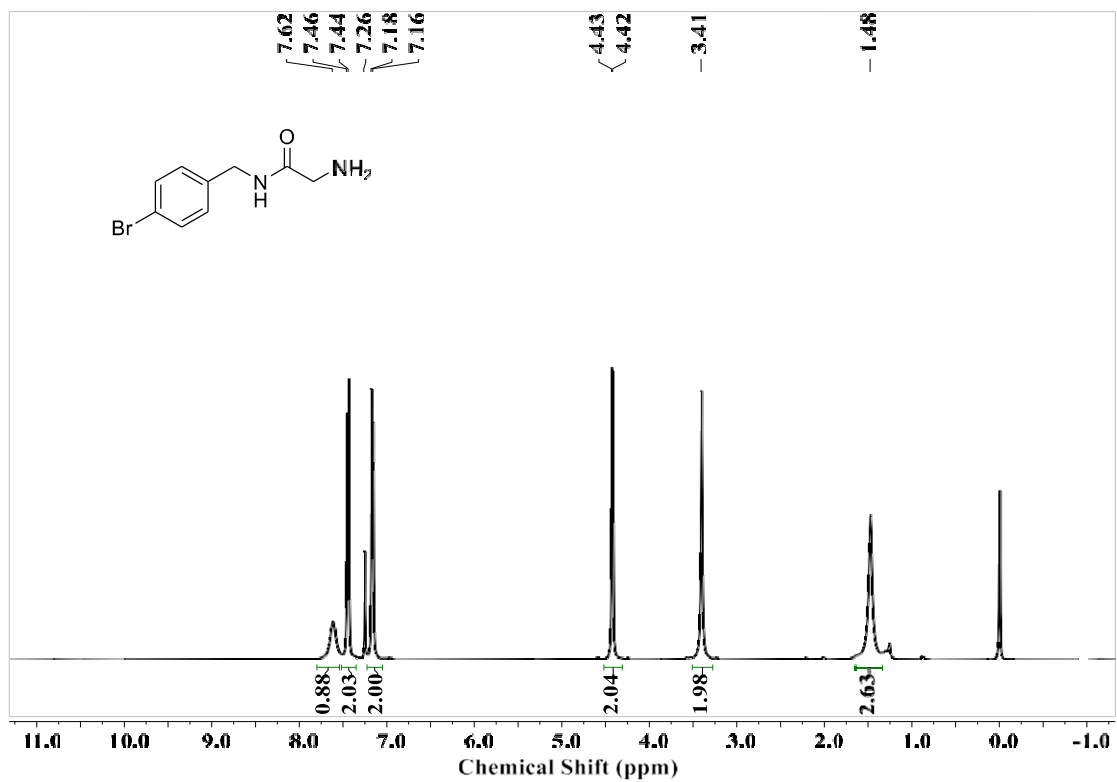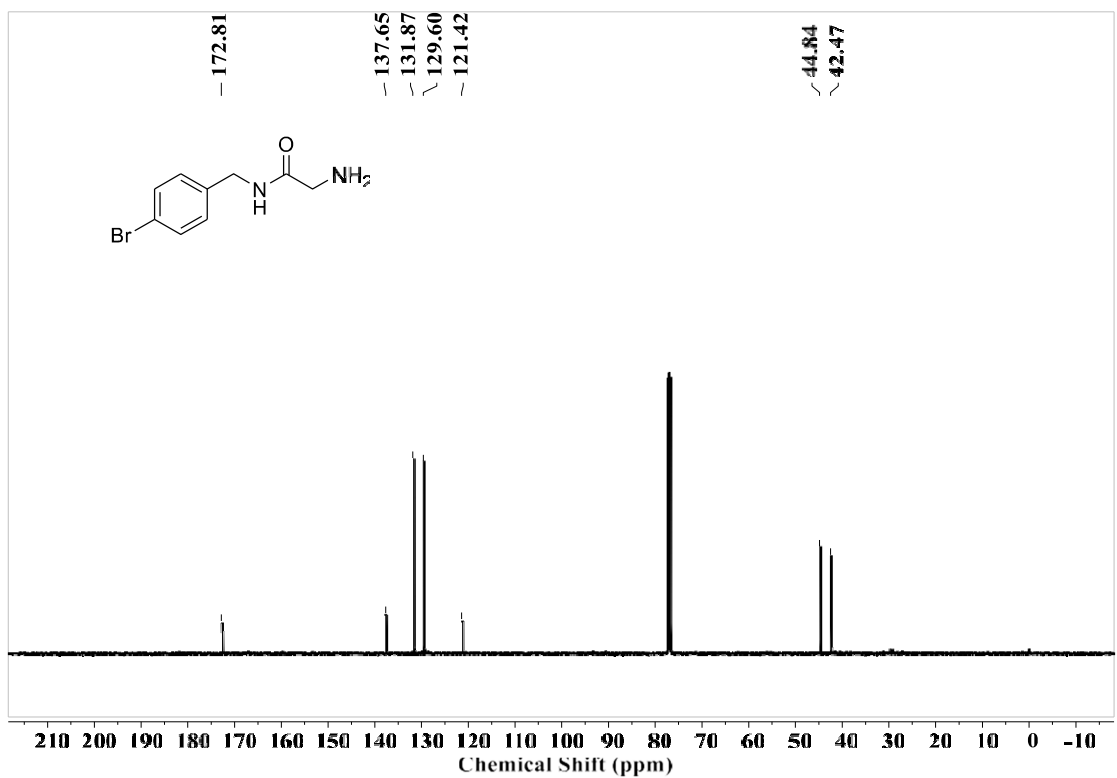

### 3 Reference List for the Characterization Data of the Azides **1** and the Products **3**

Organic azides methyl 4-azidobenzoate **1a**[29,30], 1-azido-4-nitrobenzene **1b**[30], 1-azido-4-(trifluoromethyl)benzene **1c**[30], 1-azido-4-ethynylbenzene **1d**[45], 4-azidobenzenesulfonyl fluoride **1e**[46], 1-azido-4-methoxybenzene **1f**[30], 1-azido-4-iodobenzene **1g**[47], 1-azido-3,5-bis(trifluoromethyl)benzene **1h**[48], methyl 4-azido-2,3,5,6-tetrafluorobenzoate **1i**[48], 1-azido-2-(*tert*-butyl)benzene **1k**[49], 1-azido-2-methylbenzene **1l**[48], 1-azido-3-methoxybenzene **1m**[48], (azidomethylene)dibenzene **1n**[31], (1-azidoethyl)benzene **1o**[46], 2-(azidomethyl)naphthalene **1p**[31], 1-(azidomethyl)-4-nitrobenzene **1q**[31], (4-(azidomethyl)phenyl)(phenyl)methanone **1r**[50], 2-azido-*N*-benzylacetamide **1t**[51], 1-(azidomethyl)pyrene **1u**[52], (2-(4-(azidomethyl)phenyl)ethene-1,1,2-triyl)tribenzene **1v**[53] are known compounds and their analytical data were consistent with literature data.

Methyl 4-aminobenzoate **3a**[54], 4-nitroaniline **3b**[54], 4-(trifluoromethyl)aniline **3c**[54], 4-ethynylaniline **3d**[55], 4-aminobenzenesulfonyl fluoride **3e**[55], 4-methoxyaniline **3f**[50], 4-iodoaniline **3g**[54], 3,5-bis(trifluoromethyl)aniline **3h**[56], methyl 4-amino-2,3,5,6-tetrafluorobenzoate **3i**[57], 2-(*tert*-butyl)aniline **3k**[58], *o*-toluidine **3l**[56], 3-methoxyaniline **3m**[55], diphenylmethanamine **3n**[59], 1-phenylethan-1-amine **3o**[59], naphthalen-2-ylmethanamine **3p**[60], (4-nitrophenyl)methanamine **3q**[61], (4-(aminomethyl)phenyl)(phenyl)methanone **3r**[50], 2-amino-*N*-benzylacetamide **3t**[62], pyren-1-ylmethanamine **3u**[63], (4-(1,2,2-triphenylvinyl)phenyl)methanamine **3v**[64] are known compounds and their analytical data were consistent with literature data.
